# Supplementary material
Source: PubMed Central journal article supplement (PMC3906423)

*Supporting Information for*

**Synthesis of a Tristearoyl Lipomannan via Pre-activation-based  
Iterative One-pot Glycosylation**

Jian Gao<sup>†</sup> and Zhongwu Guo<sup>†,‡,\*</sup>

<sup>†</sup> *Department of Chemistry, Wayne State University, Detroit, Michigan 48202, USA*

<sup>‡</sup> *National Glycoengineering Research Center, Shandong University, Jinan 250100, China*

<sup>\*</sup> *Corresponding author, E-mail: [zwguo@chem.wayne.edu](mailto:zwguo@chem.wayne.edu)*

**Table of Contents:**

|                                         |              |
|-----------------------------------------|--------------|
| NMR spectra of compound <b>11</b> ----- | page 2 - 3   |
| NMR spectra of compound <b>6</b> -----  | page 3 - 4   |
| NMR spectra of compound <b>7</b> -----  | page 5 - 6   |
| NMR spectra of compound <b>8</b> -----  | page 6 - 7   |
| NMR spectra of compound <b>15</b> ----- | page 8 - 9   |
| NMR spectra of compound <b>9</b> -----  | page 9 - 10  |
| NMR spectra of compound <b>16</b> ----- | page 11 - 13 |
| NMR spectra of compound <b>17</b> ----- | page 14 - 15 |
| NMR spectra of compound <b>2</b> -----  | page 16 - 18 |
| NMR spectra of compound <b>18</b> ----- | page 18 - 21 |
| NMR spectra of compound <b>3</b> -----  | page 21 - 24 |
| NMR spectra of compound <b>19</b> ----- | page 24 - 25 |
| NMR spectra of compound <b>20</b> ----- | page 26 - 28 |
| NMR spectra of compound <b>22</b> ----- | page 29 - 31 |
| NMR spectra of compound <b>23</b> ----- | page 32 - 34 |
| NMR spectra of compound <b>25</b> ----- | page 35 - 37 |
| NMR spectra of compound <b>26</b> ----- | page 38 - 40 |
| NMR spectra of compound <b>1</b> -----  | page 41      |

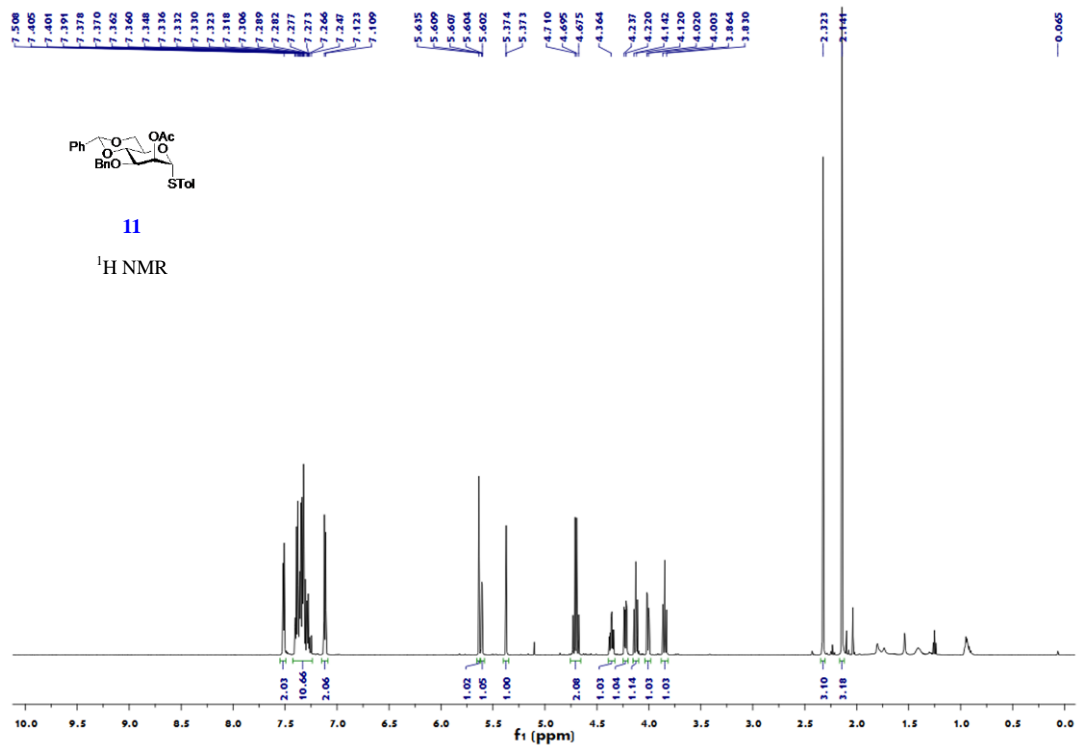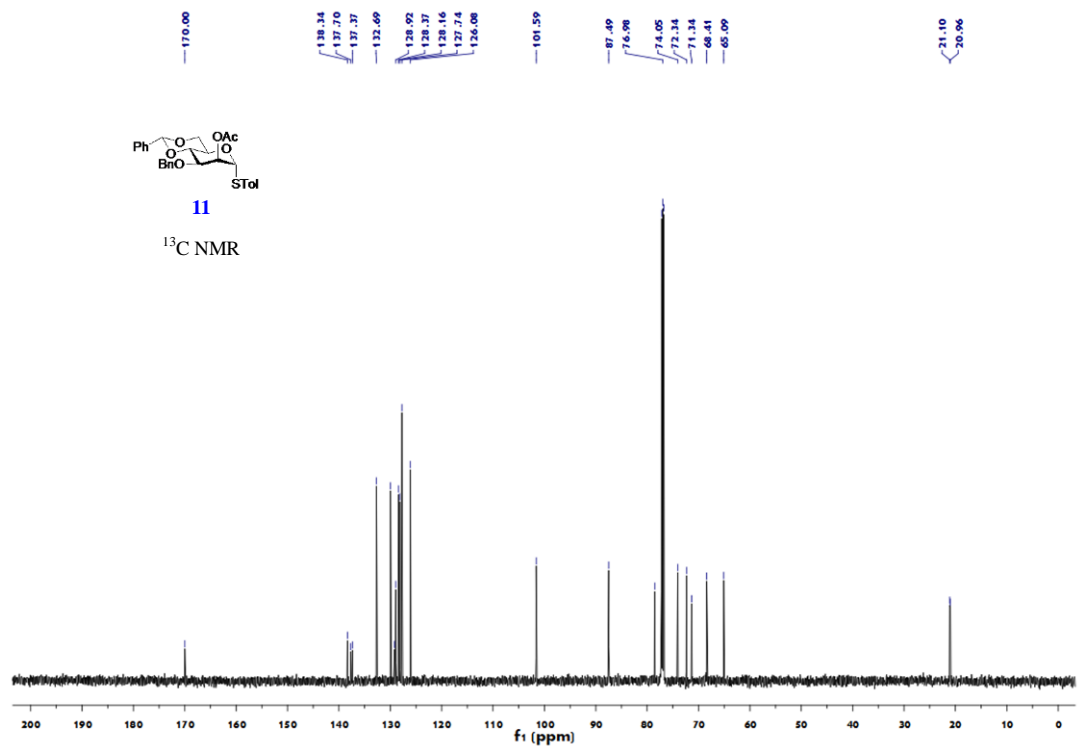

Sample Name:  
 Data Collected on:  
 a600-vmr600  
 Archive directory:  
 /home/vmr1/vmr600/probes/probe\_calibs  
 Sample directory:

FidFile: gCOSY

Pulse Sequence: gCOSY  
 Solvent: cdcl3  
 Data collected on: Apr 5 2013

GJ120004-BC

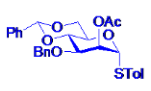

11

<sup>1</sup>H-<sup>1</sup>H COSY

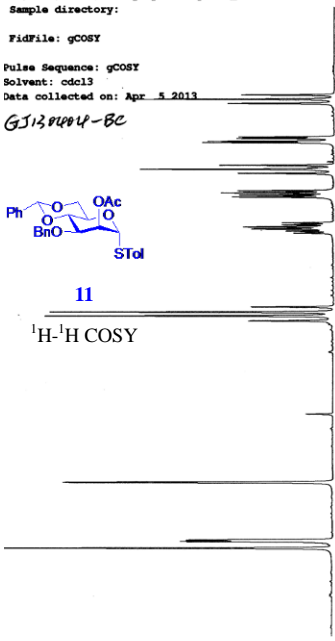

Agilent 600 NMR spectrometer

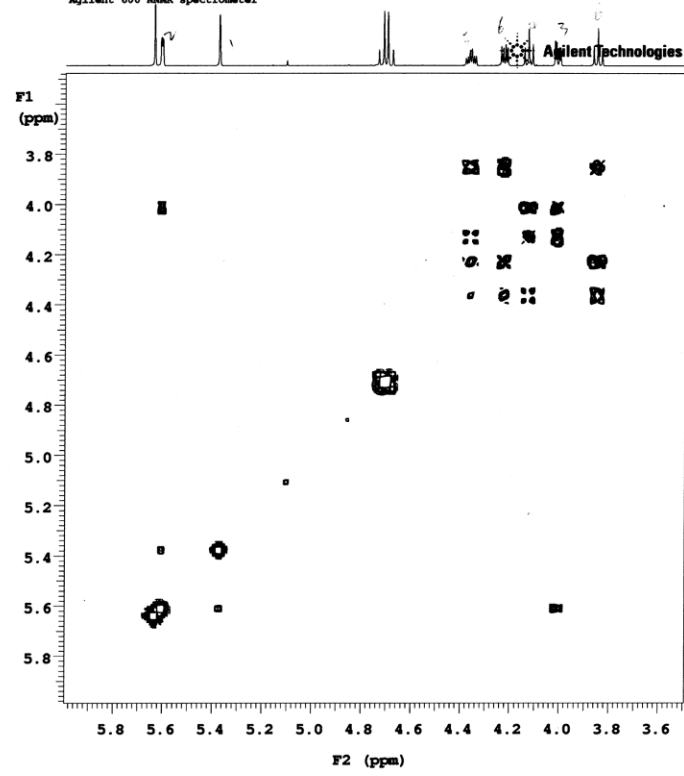

7.245  
7.250  
7.255  
7.260  
7.265  
7.270  
7.275  
7.280  
7.285  
7.290  
7.295  
7.300  
7.305  
7.310  
7.315  
7.320  
7.325  
7.330  
7.335  
7.340  
7.345  
7.350

5.625  
5.621  
5.617  
5.613  
5.398  
5.394  
4.961  
4.933  
4.732  
4.643  
4.555  
4.509  
4.480  
3.974  
3.969  
3.820  
3.806  
3.802  
3.832

0.194

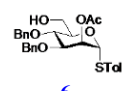

6

<sup>1</sup>H NMR

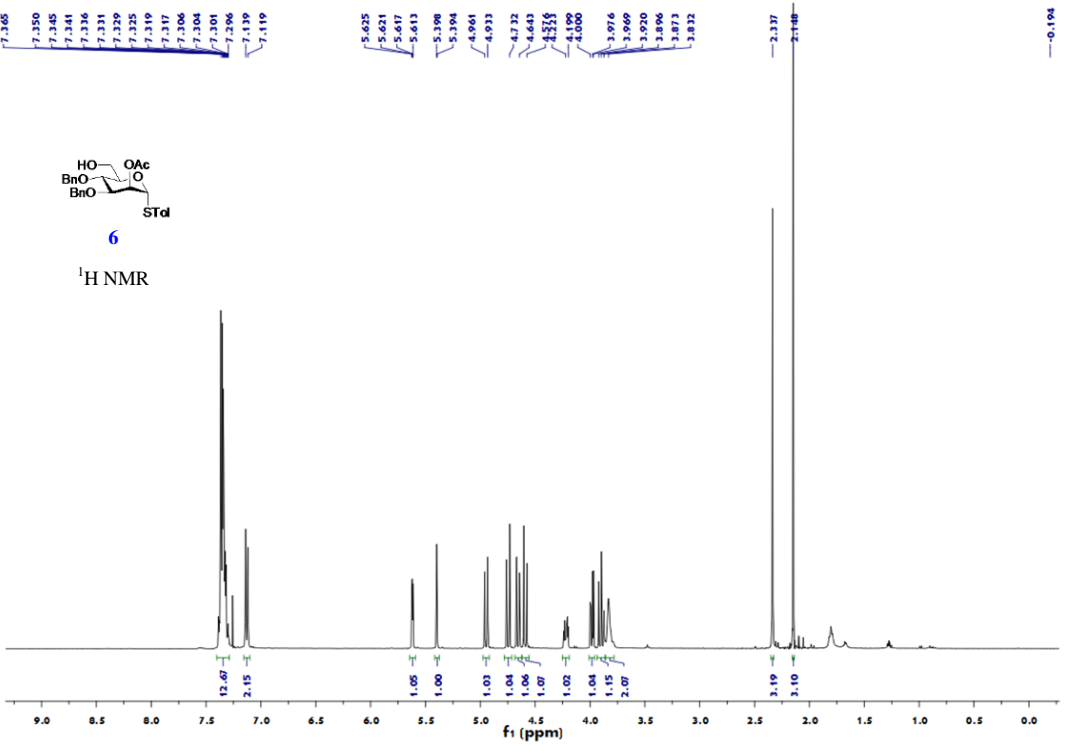

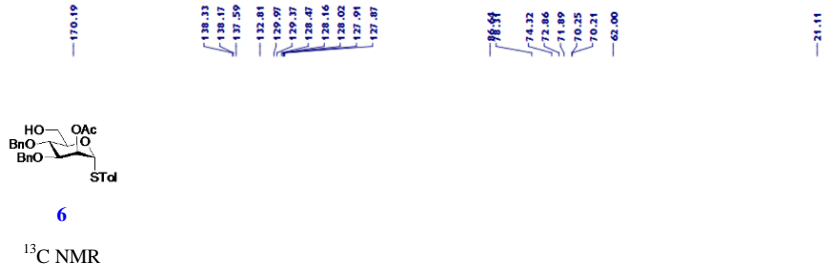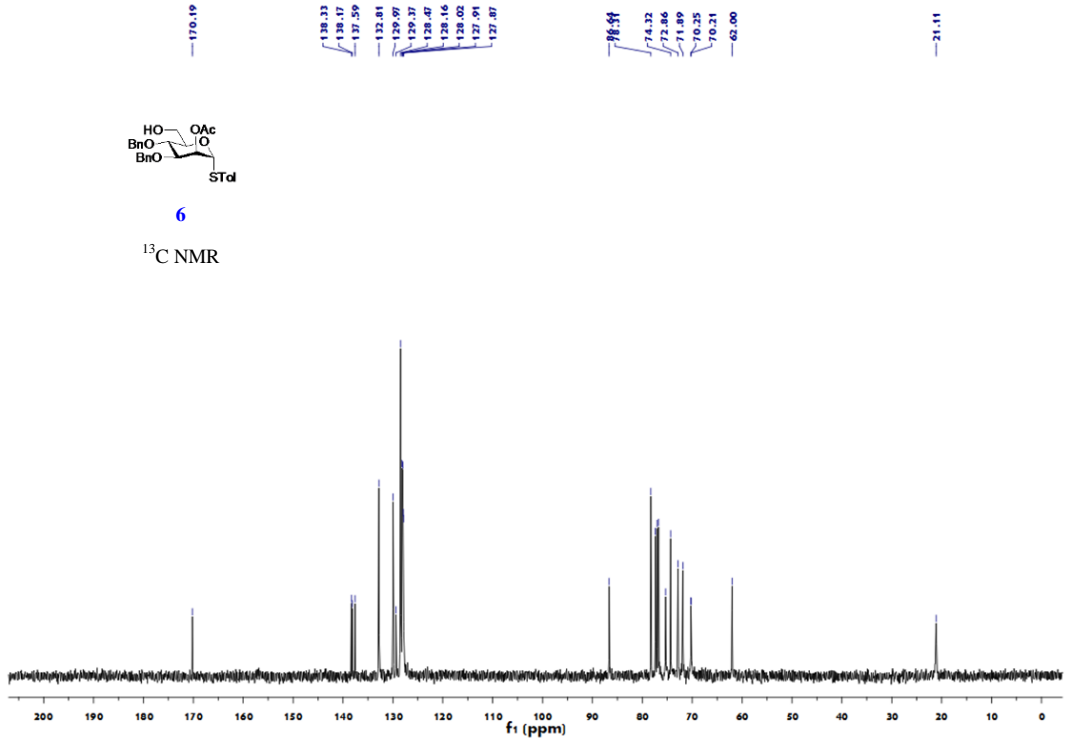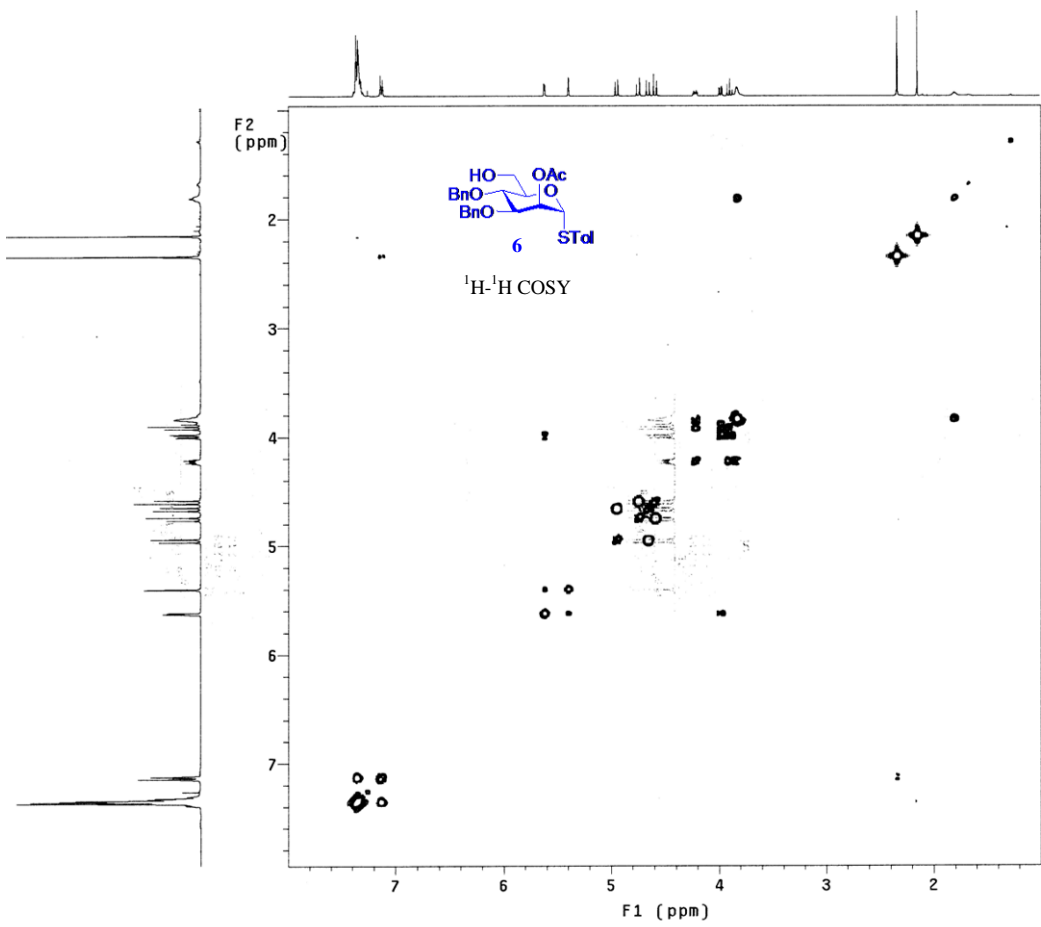

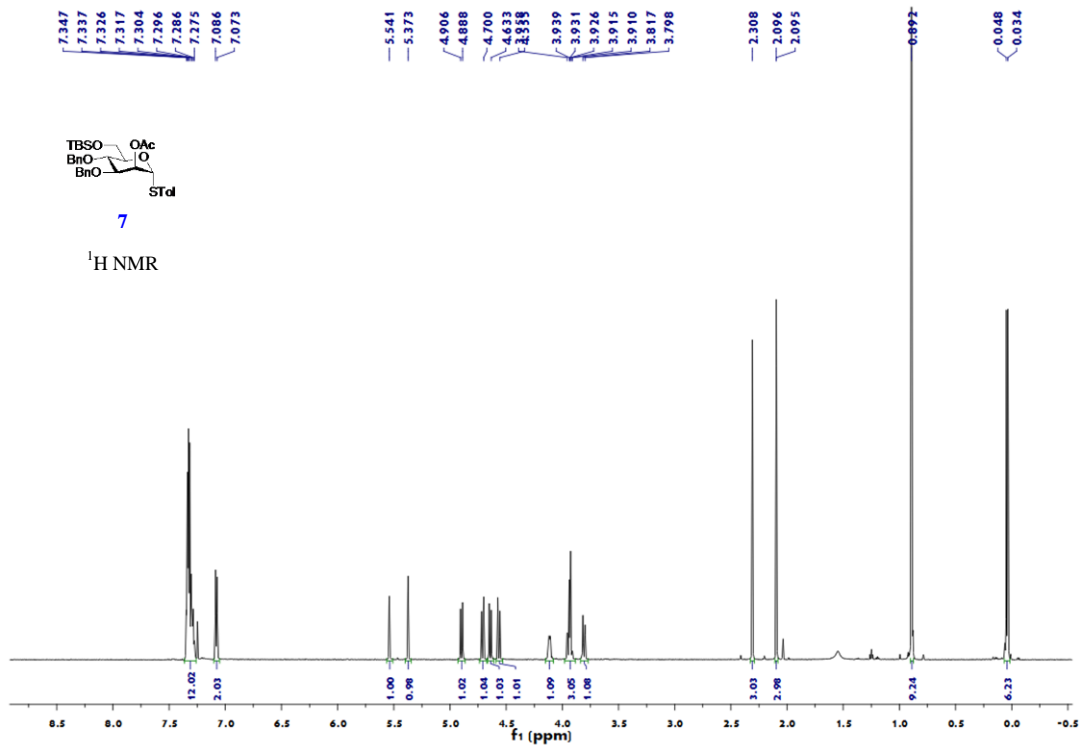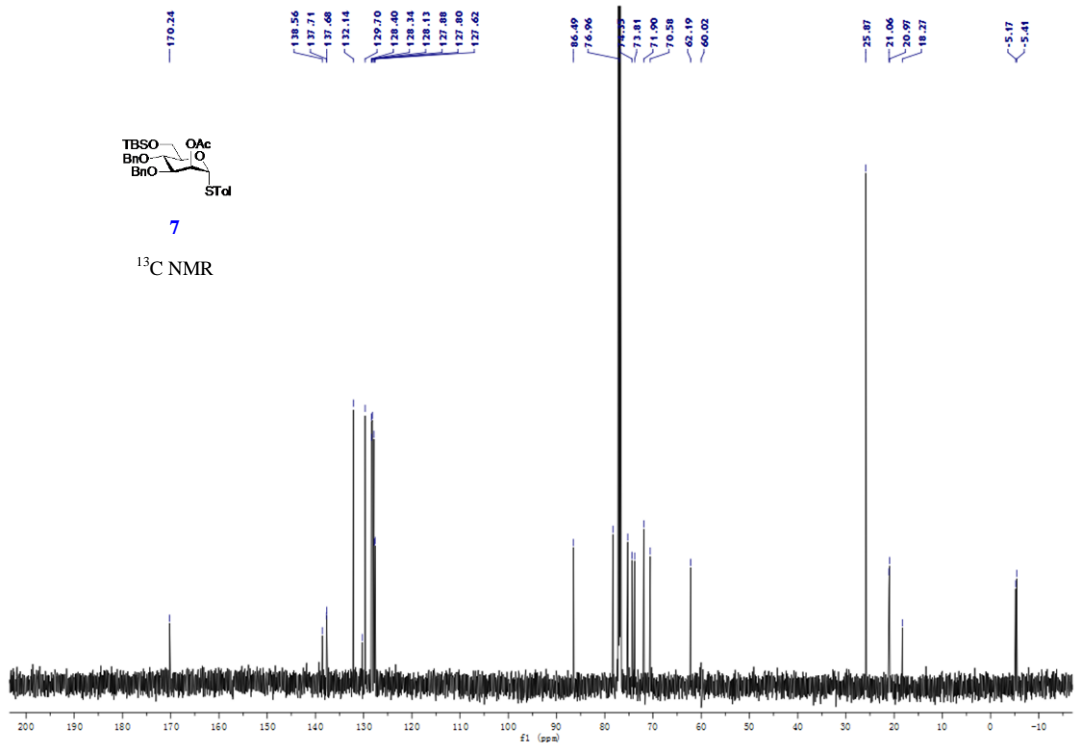

Sample Name:  
 Data Collected on:  
 a600-vnmrs600  
 Archive directory:  
 /home/vnmr1/vnmrsays/probes/probe\_calibs  
 Sample directory:

Agilent 600 NMR spectrometer

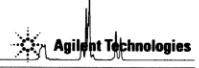

FidFile: gCOSY  
 Pulse Sequence: gCOSY  
 Solvent: cdcl3  
 Data collected on: Apr 8 2013

GJ130407-TB6D

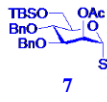

<sup>1</sup>H-<sup>1</sup>H COSY

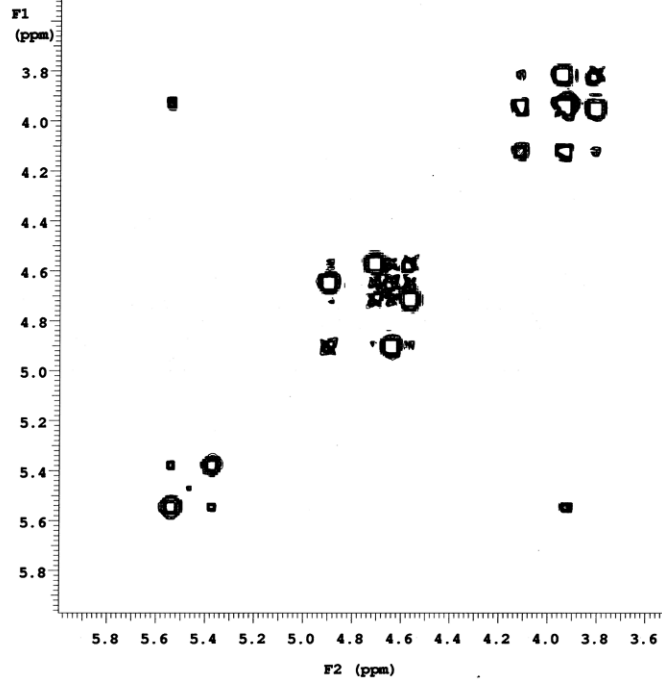

7.346  
7.346  
7.356  
7.352  
7.342  
7.331  
7.329  
7.321  
7.318  
7.313  
7.310  
7.307  
7.297  
7.291  
7.288  
7.279  
7.270  
7.267  
7.259  
7.256  
7.204  
7.192  
7.059  
7.047

5.602  
5.599  
5.464  
4.876  
4.716  
4.647  
4.558  
4.508  
4.455  
4.346  
3.857  
3.850  
3.847  
3.843  
3.839  
3.736  
3.718

2.102  
2.139

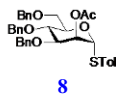

<sup>1</sup>H NMR

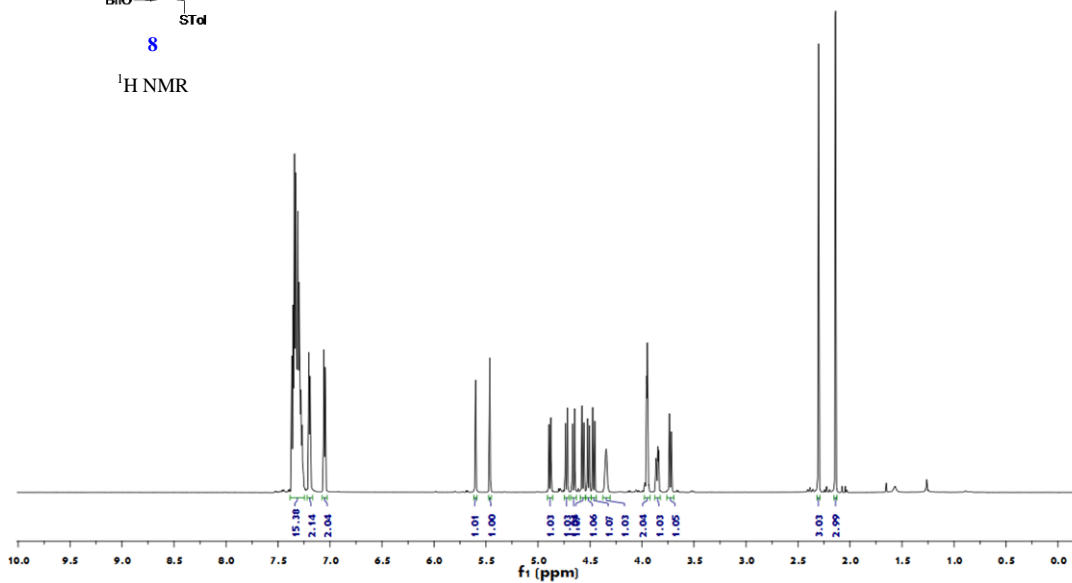

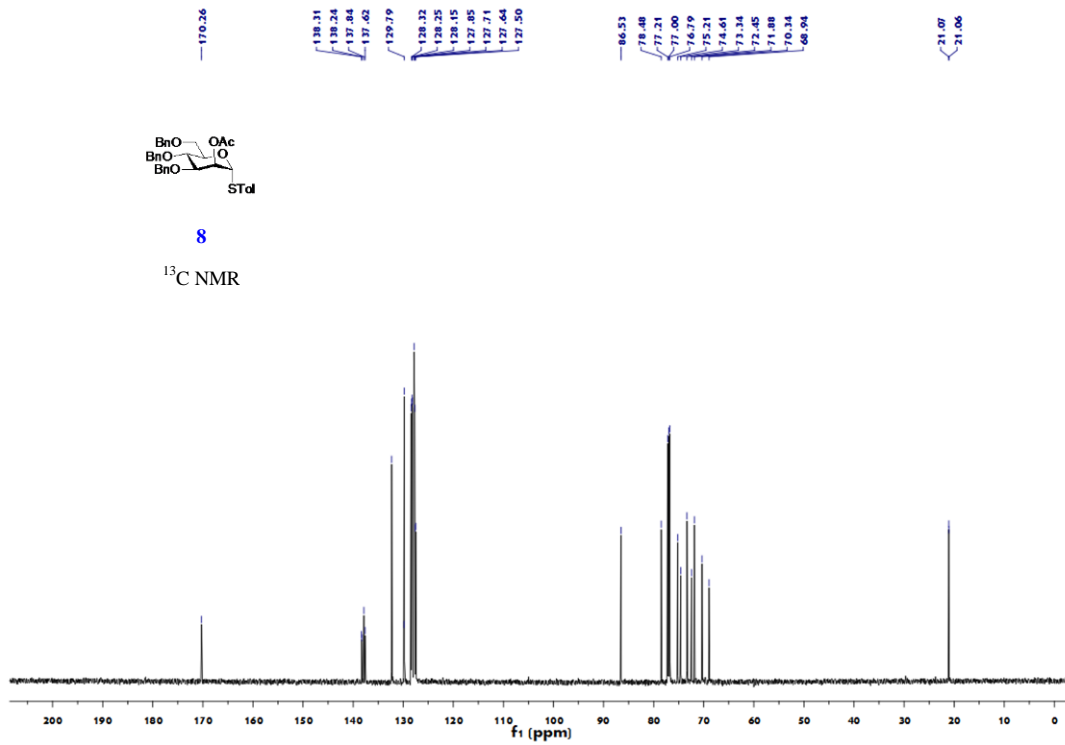

gJ-1004-gcosy  
File: xp  
Pulse Sequence: gCOSY

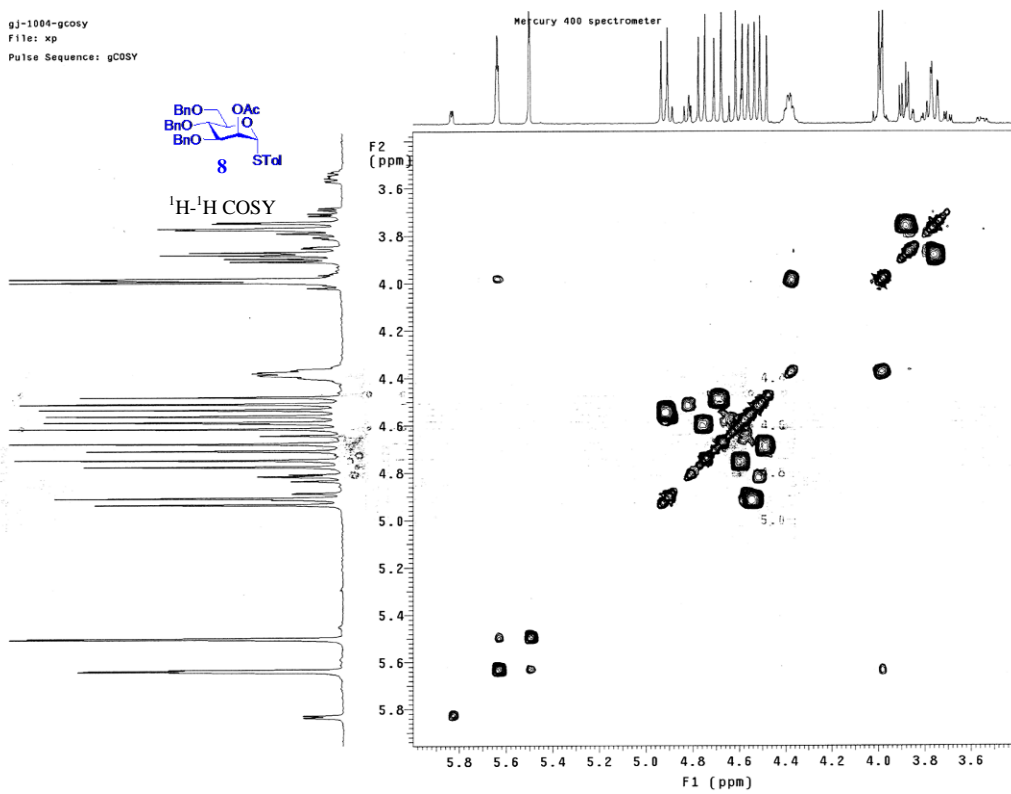

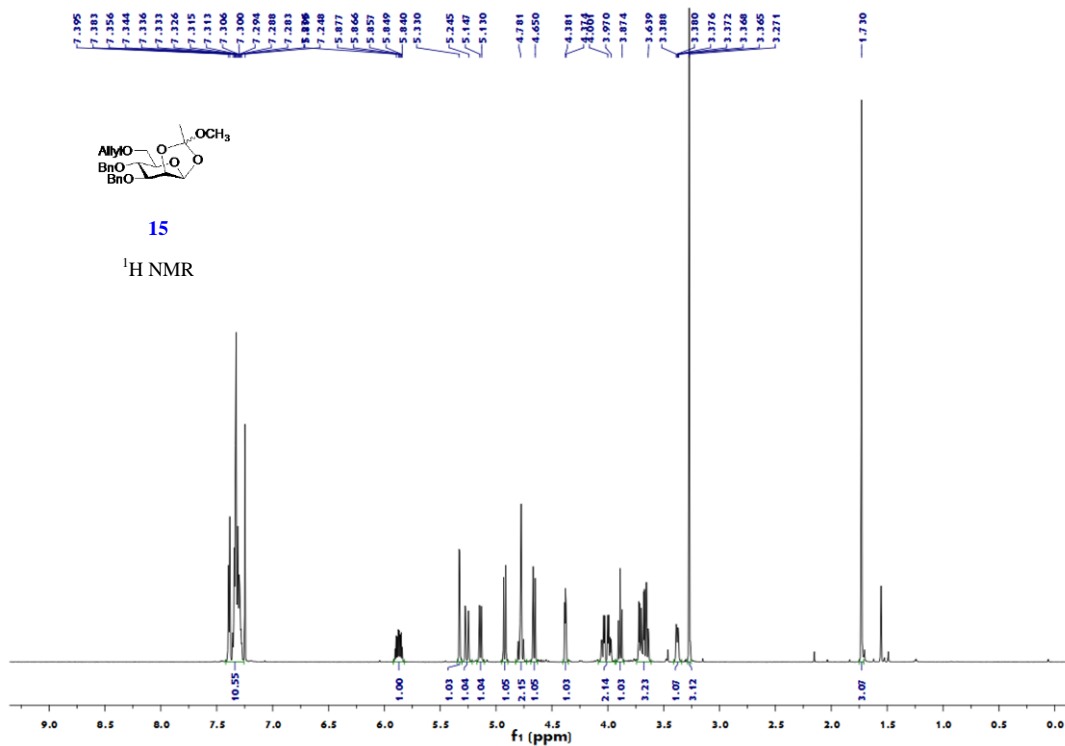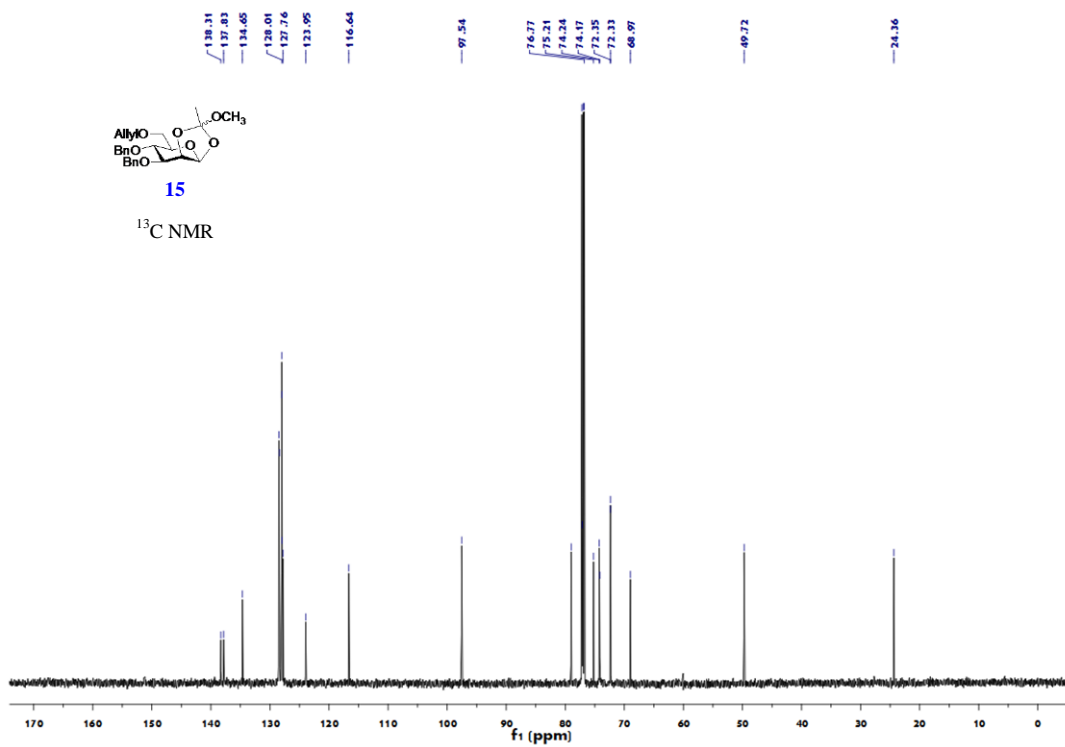



Sample Name:  
 Data Collected on:  
 a600-vmr600  
 Archive directory:  
 /home/vmr1/vmrsys/probes/probe\_calibe  
 Sample directory:

Agilent 600 NMR spectrometer

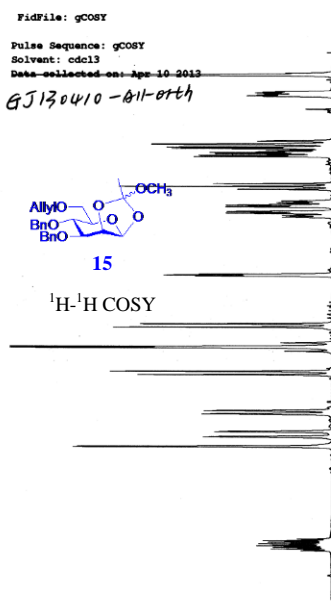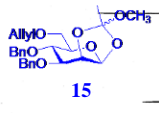

<sup>1</sup>H-<sup>1</sup>H COSY

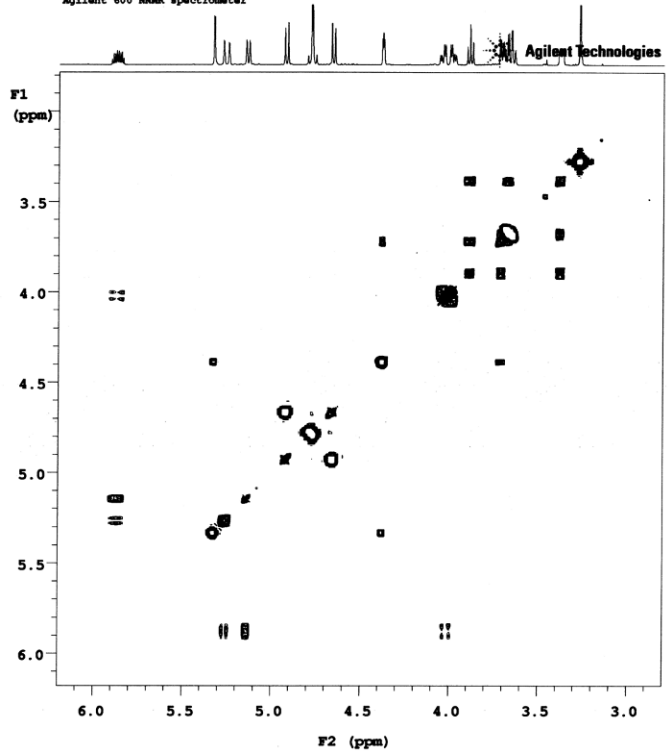

7.188  
7.167  
7.159  
7.147  
7.130  
7.104  
7.122  
7.102  
5.943  
5.941  
5.927  
5.913  
5.901  
5.887  
5.617  
5.476  
5.278  
5.172  
4.940  
4.656  
4.579  
4.327  
3.971  
3.958  
3.944  
3.839  
3.828  
3.812  
3.801  
3.702  
3.674  
2.134  
2.160

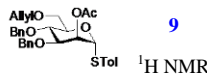

<sup>1</sup>H NMR

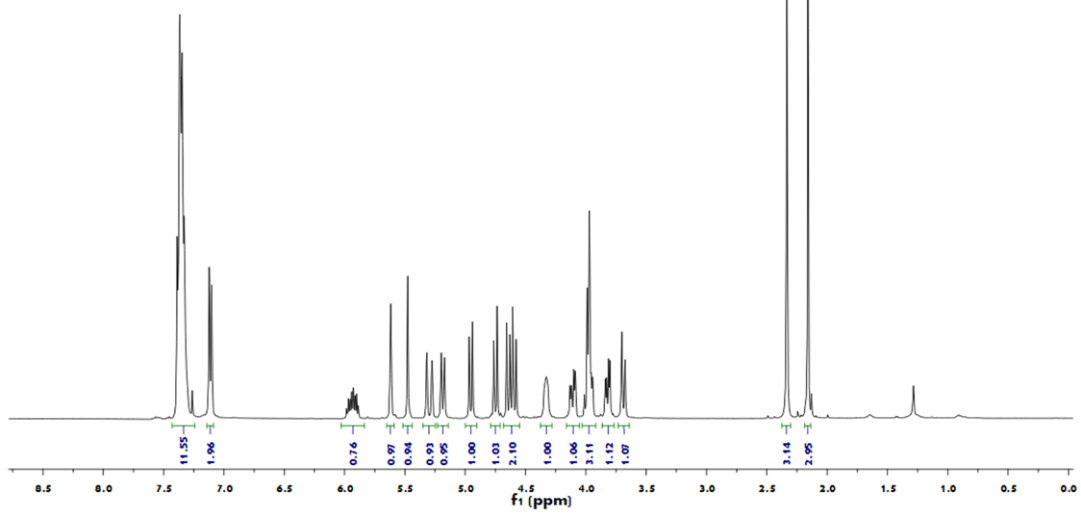

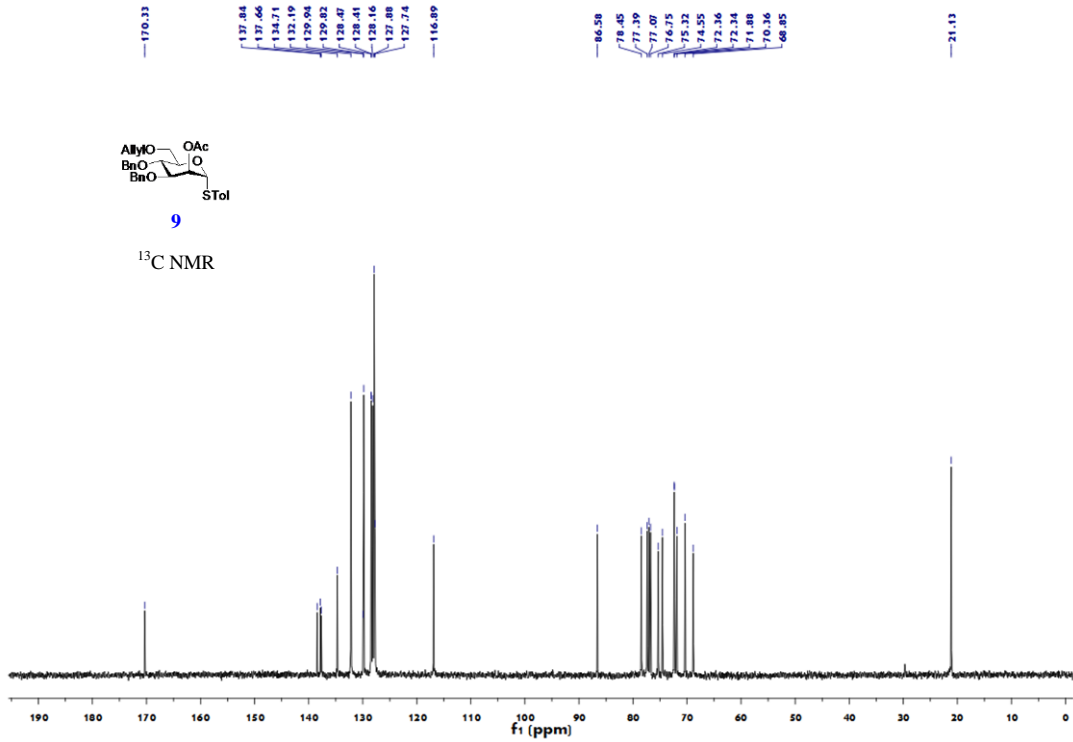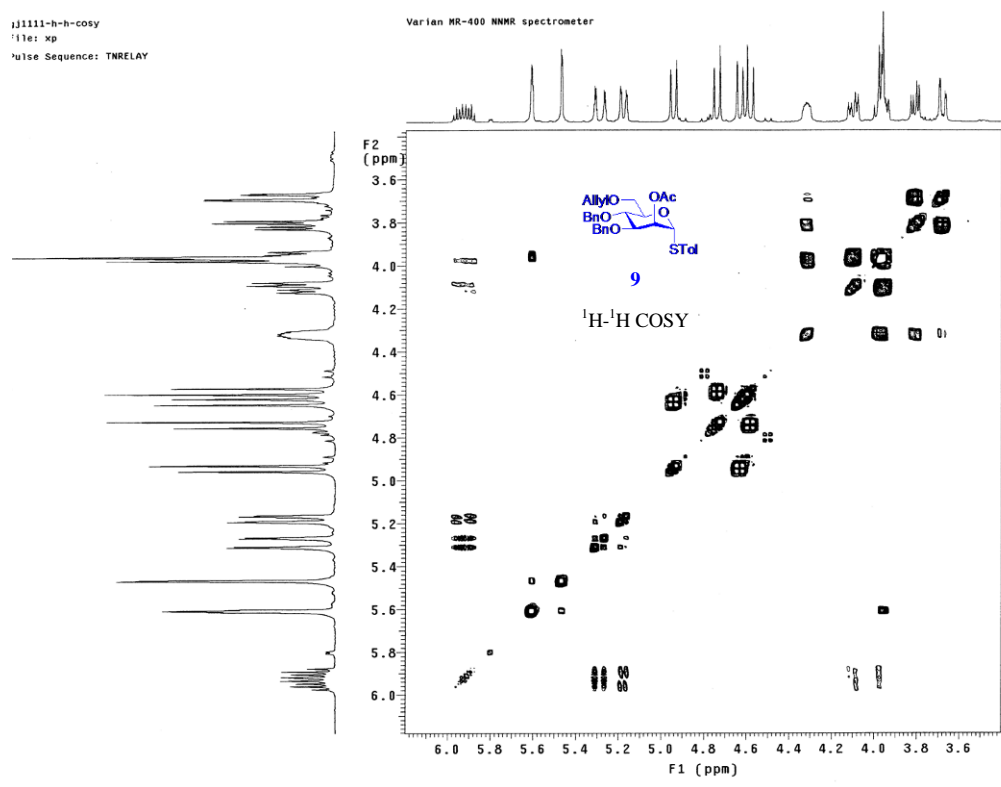

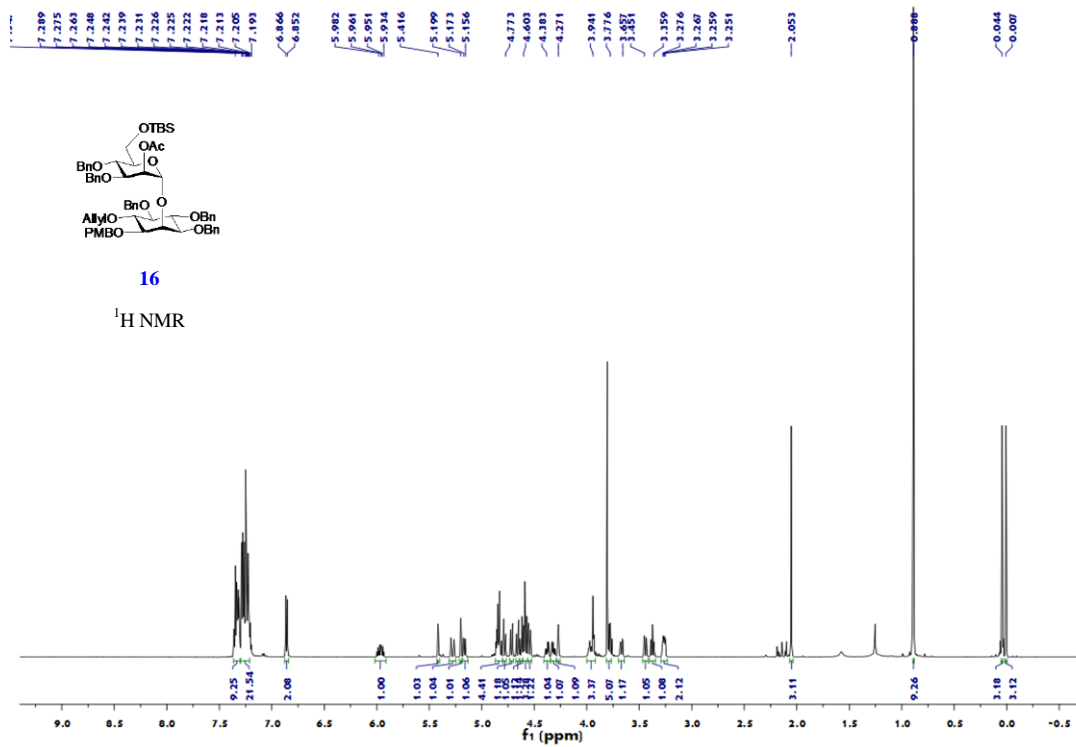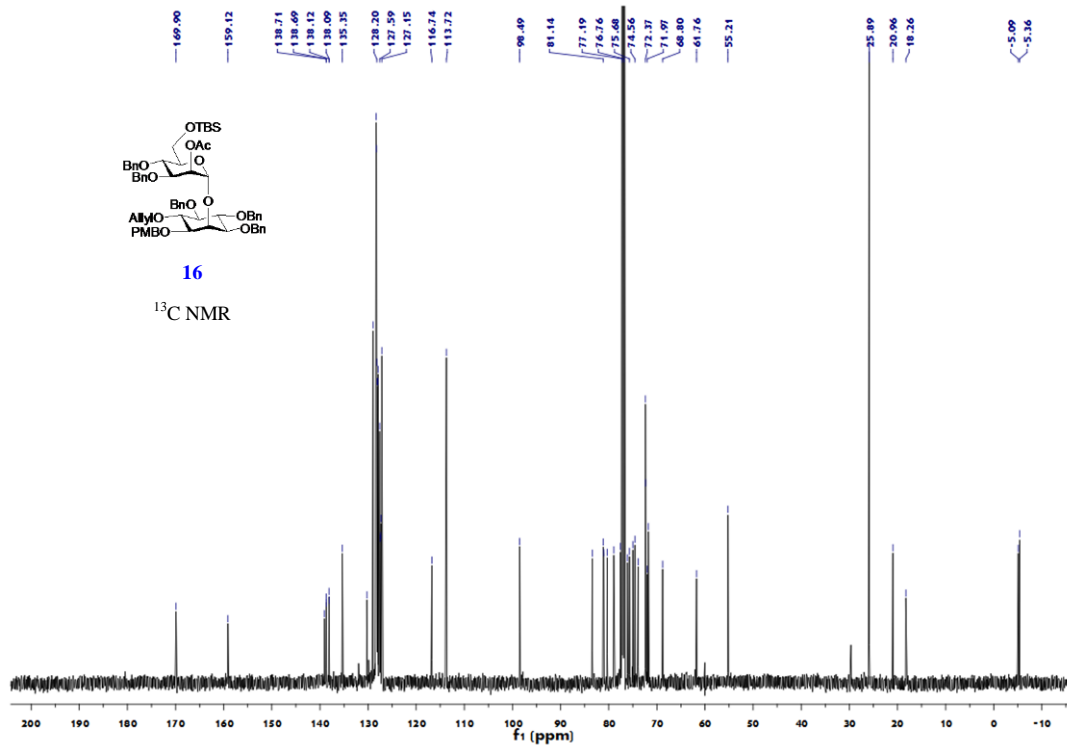

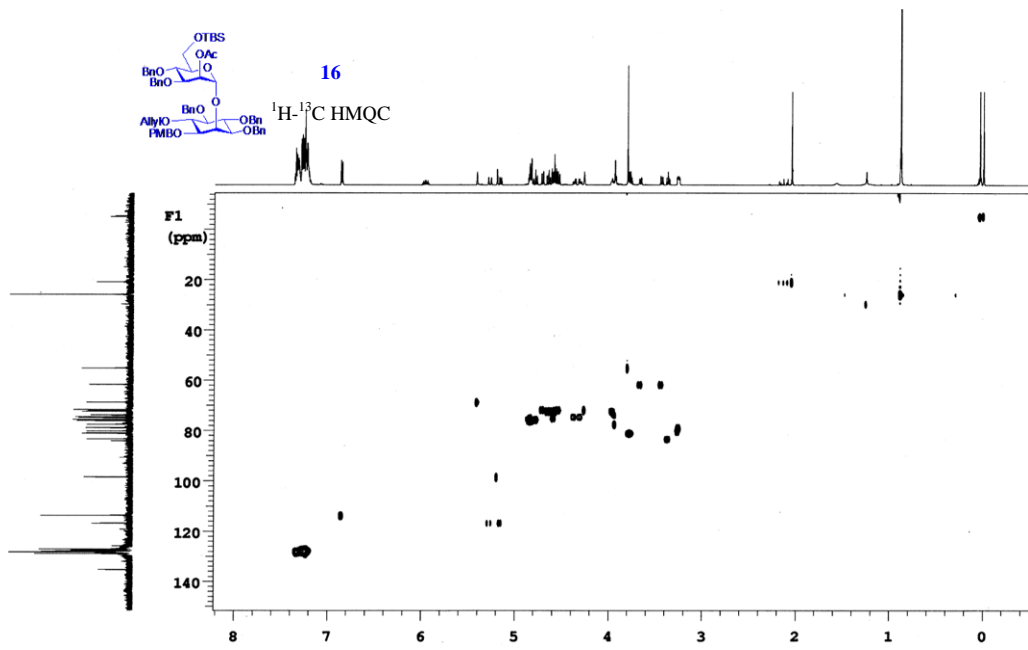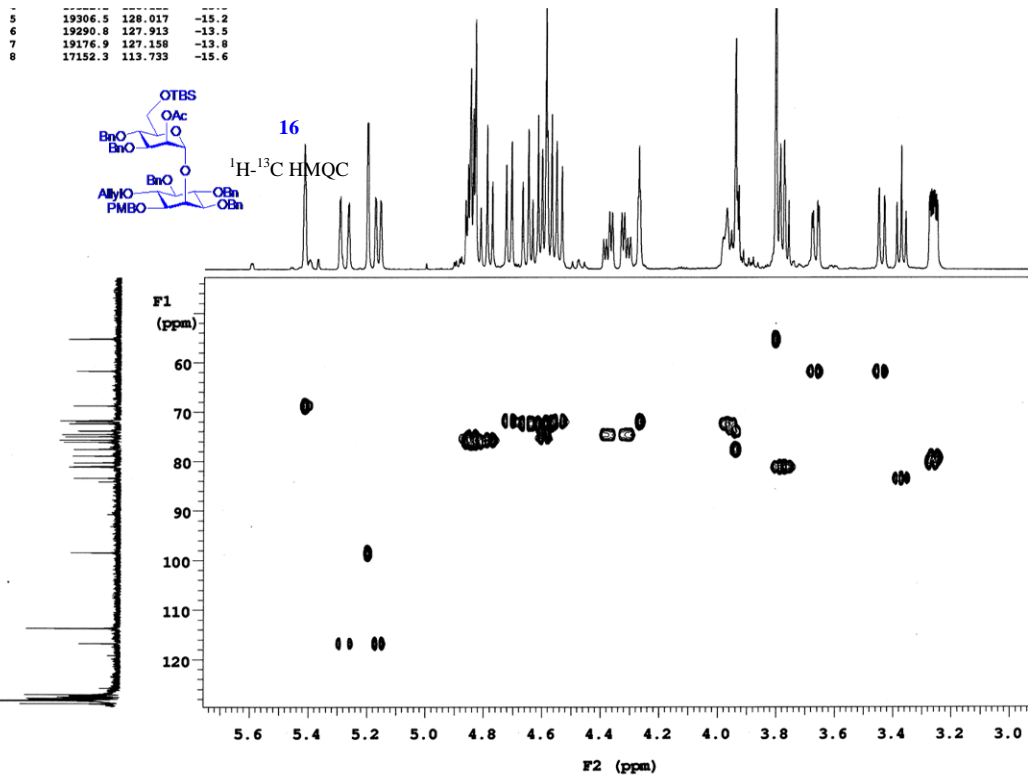

obes/probe\_calibs

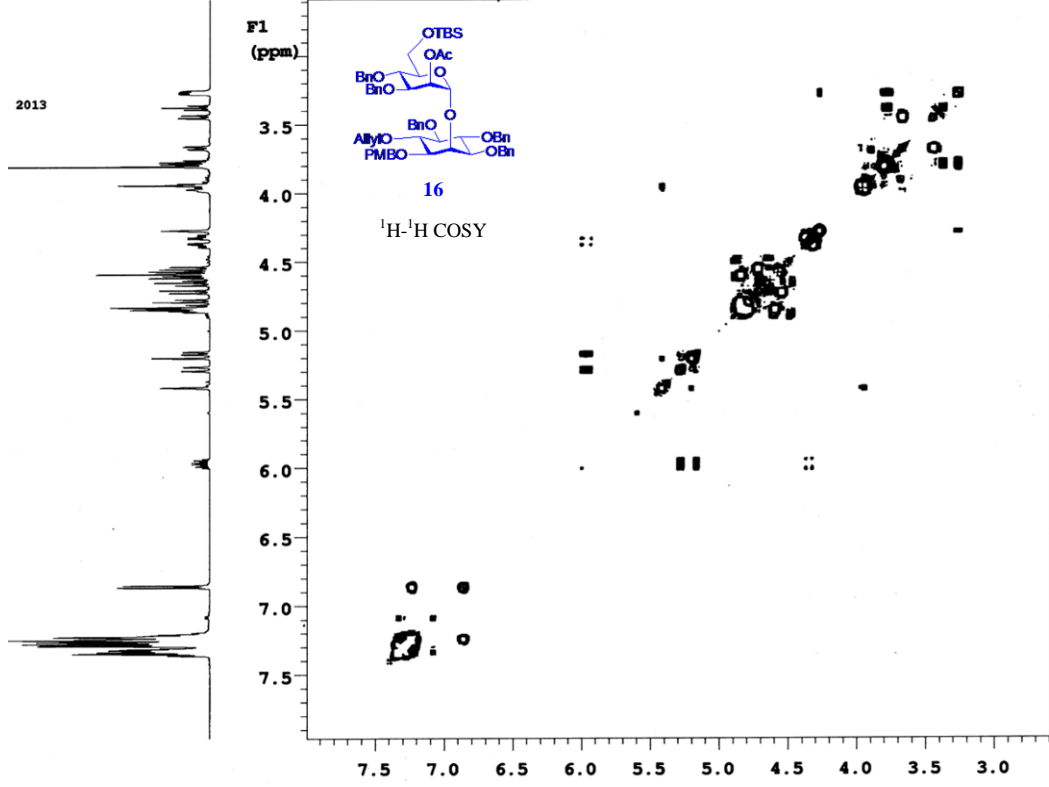

Sample Name:  
 Data Collected on:  
 #600-vmrs600  
 Archive directory:  
 /home/vmar1/vmarsys/probes/probe\_calibs  
 Sample directory:  
 Fidfile: gCOSY  
 Pulse Sequence: gCOSY  
 Solvent: cdcl3  
 Data collected on: Apr 16 2013

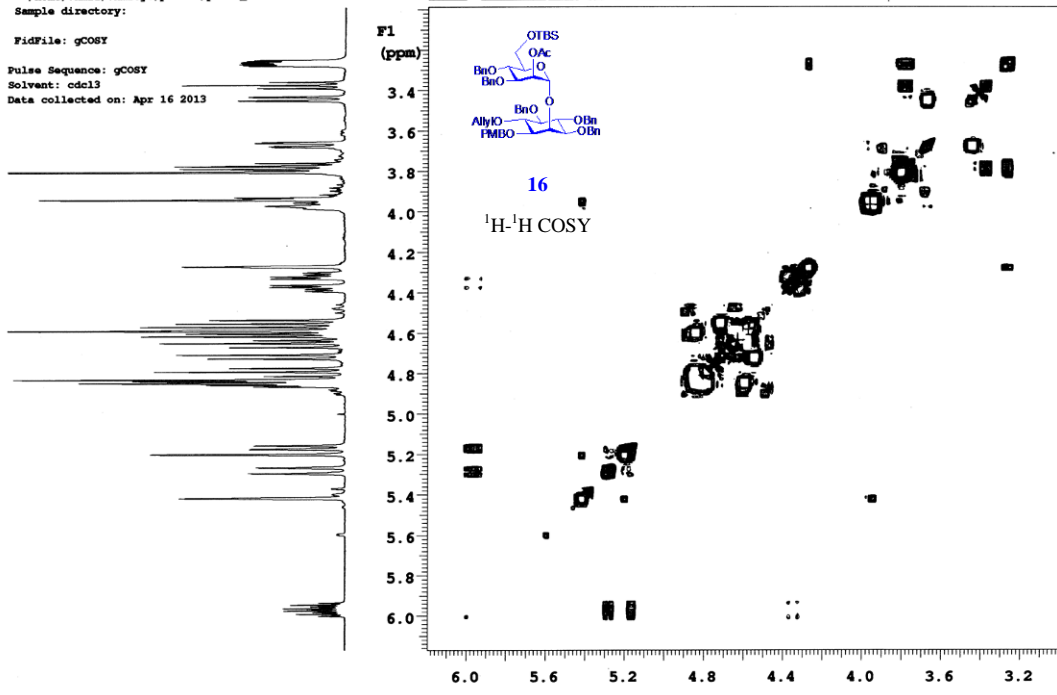

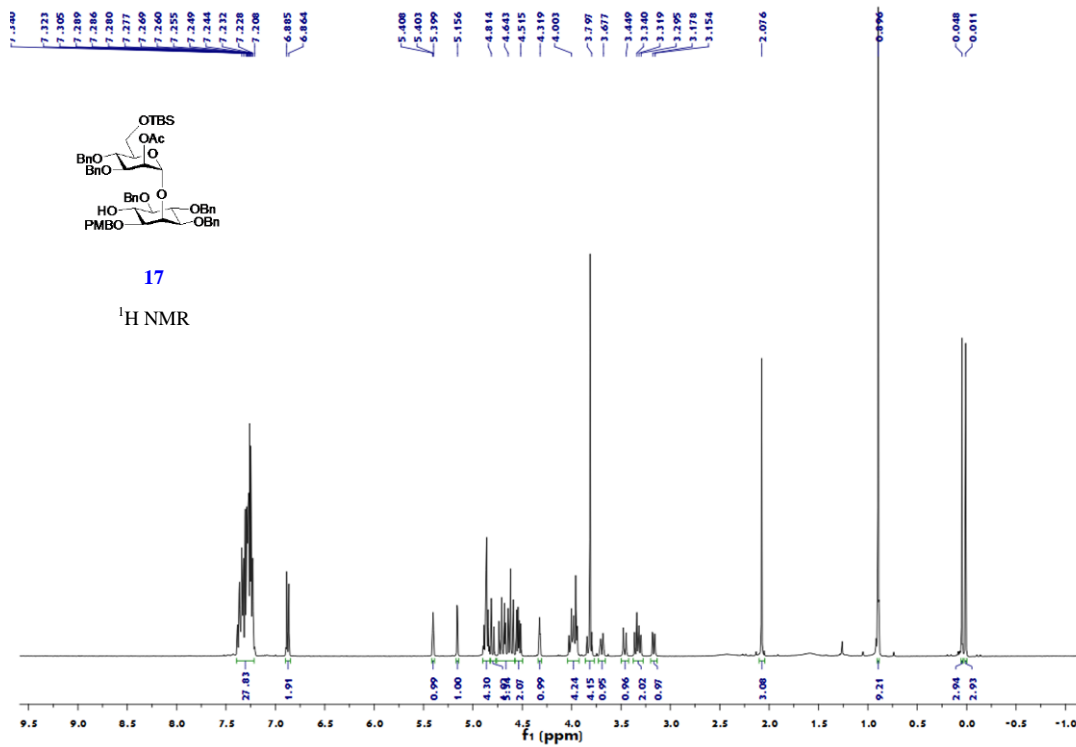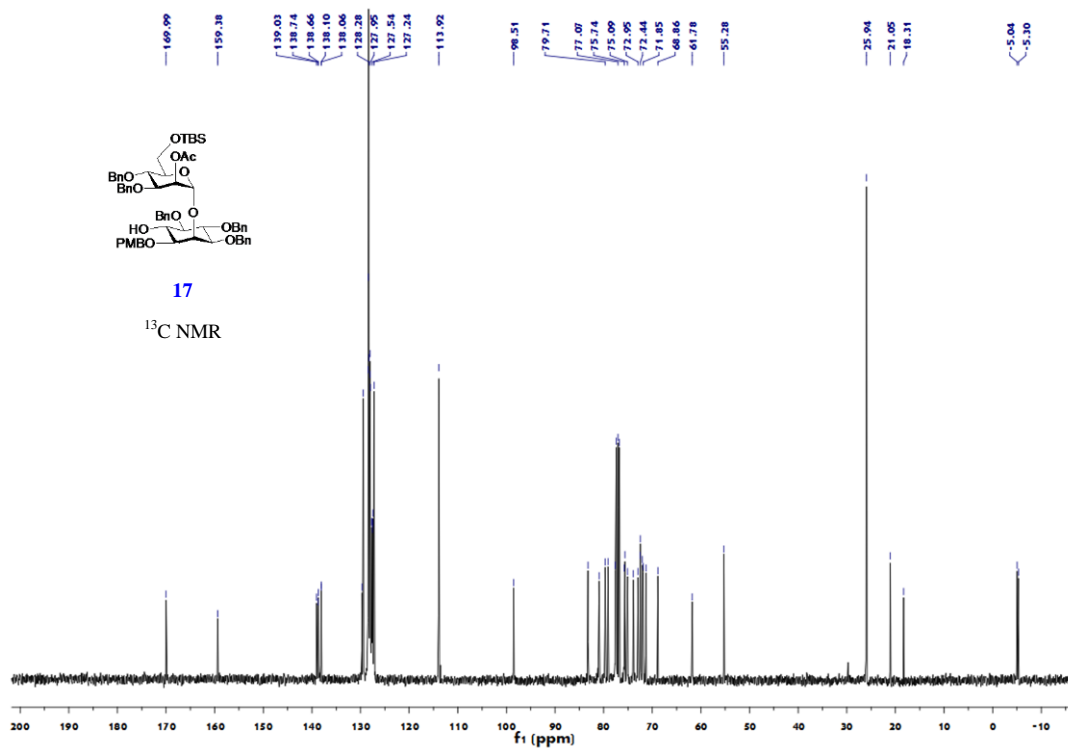

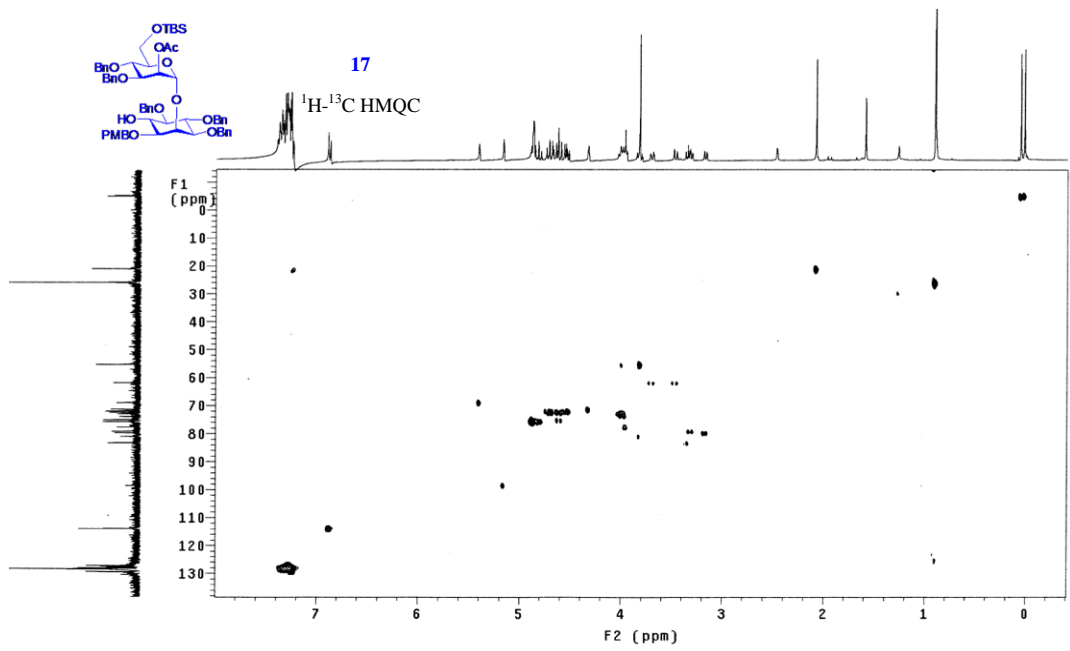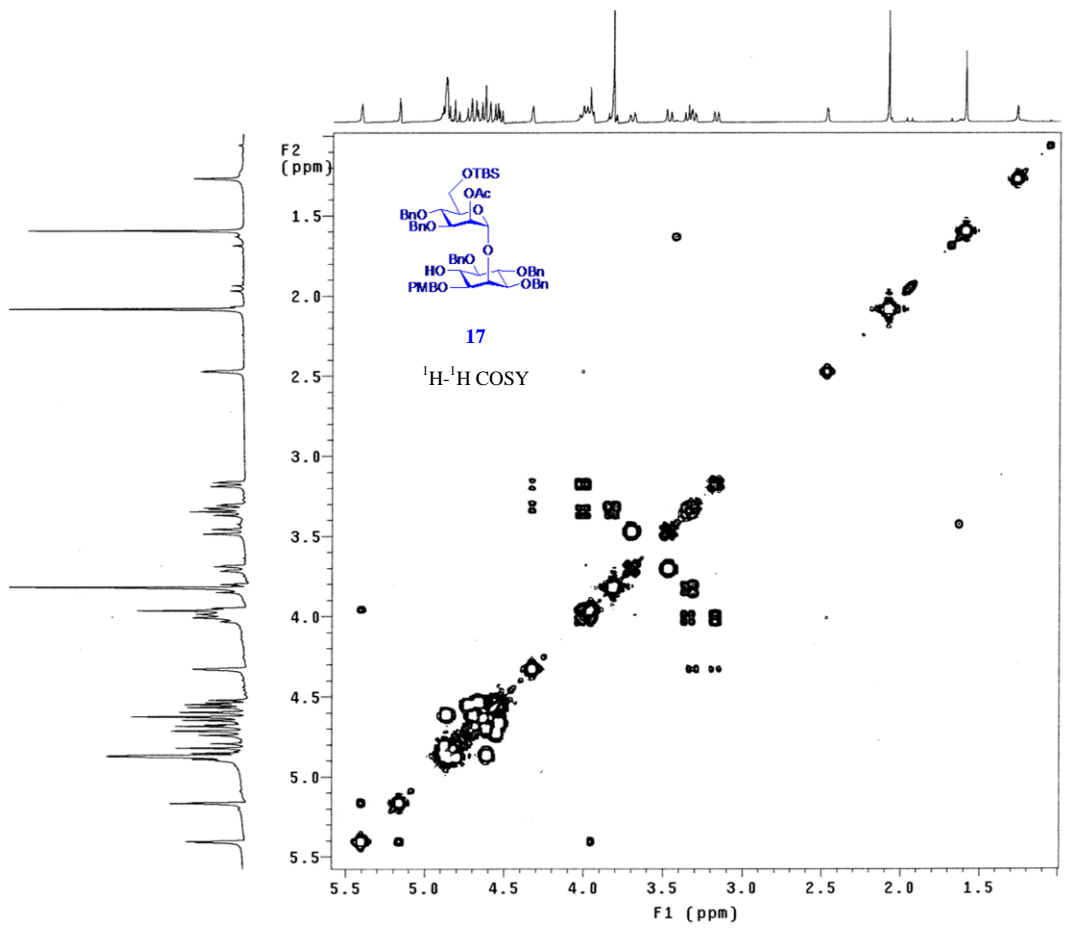

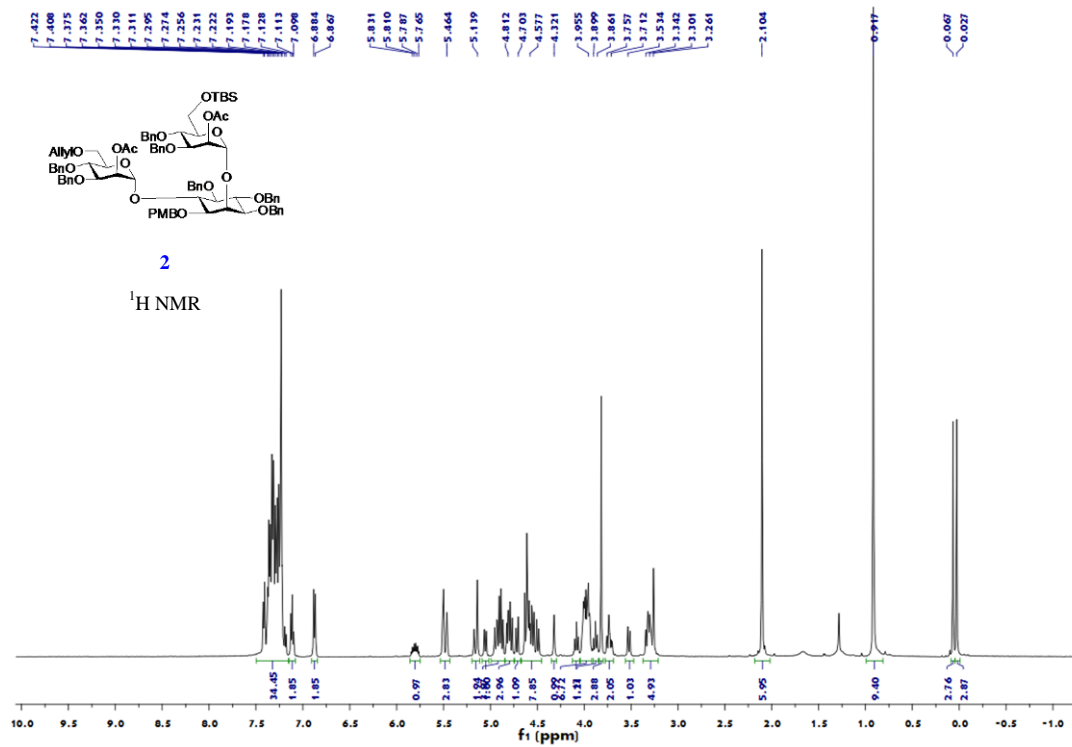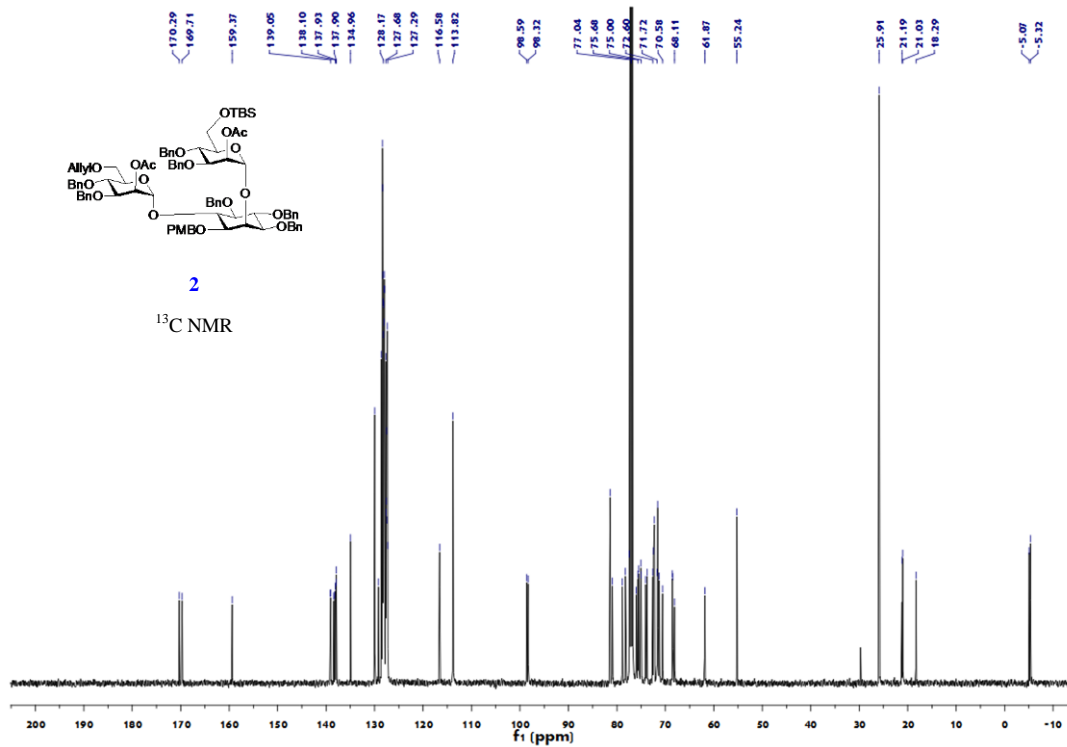



|    |         |         |      |
|----|---------|---------|------|
| 10 | 16082.7 | 128.049 | 20.7 |
| 11 | 16075.7 | 127.994 | 22.5 |
| 12 | 16072.5 | 127.988 | 22.1 |
| 13 | 16040.4 | 127.712 | 17.9 |
| 14 | 16020.4 | 127.553 | 16.2 |
| 15 | 16000.8 | 127.397 | 19.9 |
| 16 | 14301.4 | 113.887 | 14.5 |
| 17 | 8714.5  | 77.346  | 32.2 |
| 18 | 8682.4  | 77.090  | 32.5 |
| 19 | 8650.8  | 76.839  | 31.3 |
| 20 | 3258.8  | 25.946  | 32.4 |

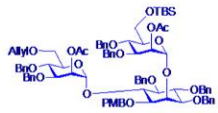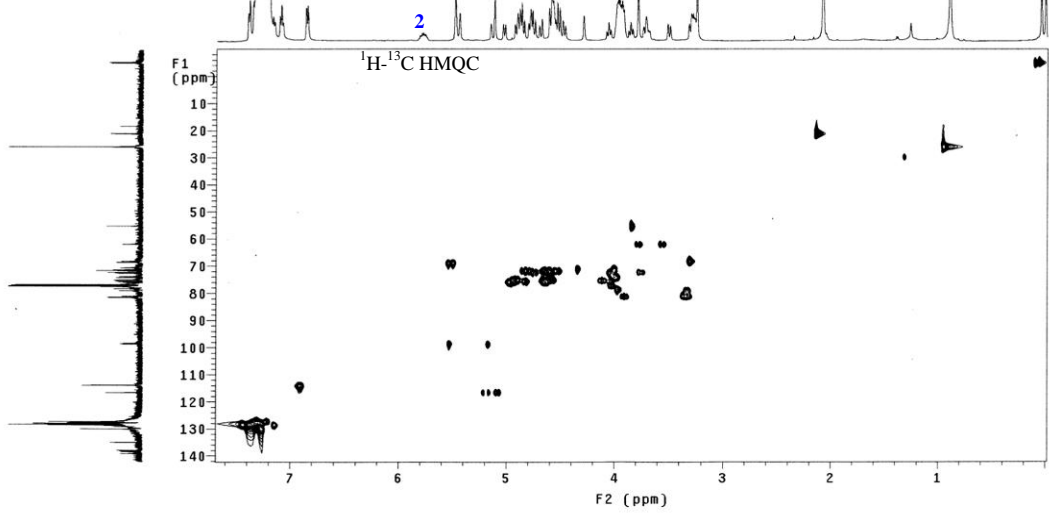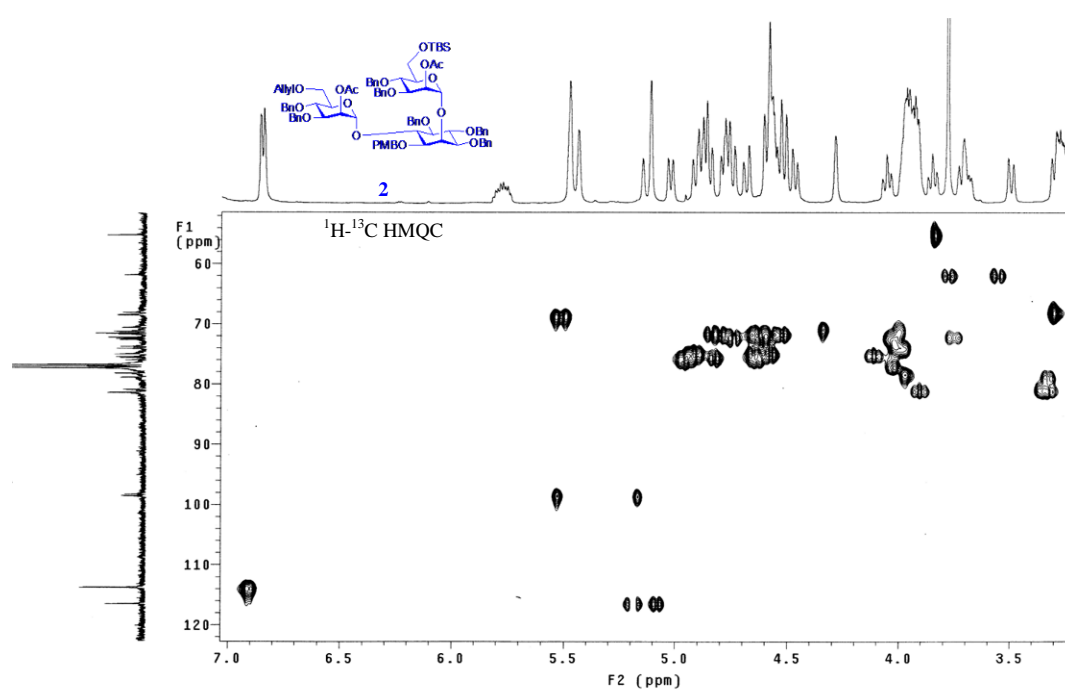

td proton  
 file: home/jiangao/gj1202-gcosy-13012scz.fid  
 ulse Sequence: gcosy

Varian 500 NMR spectrometer

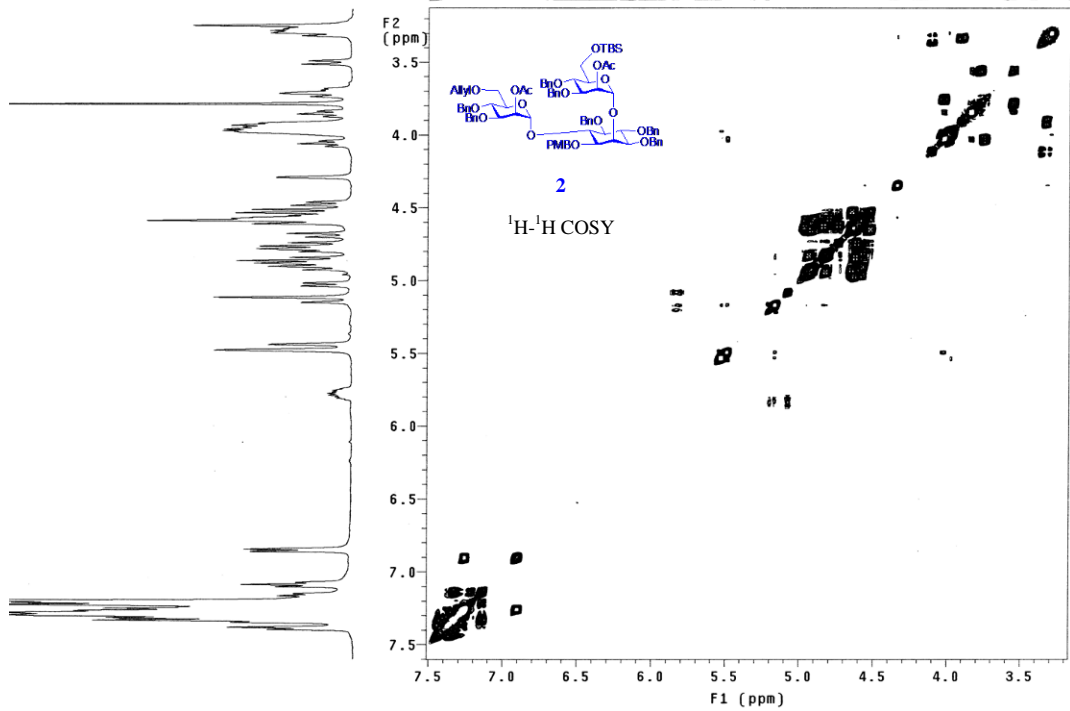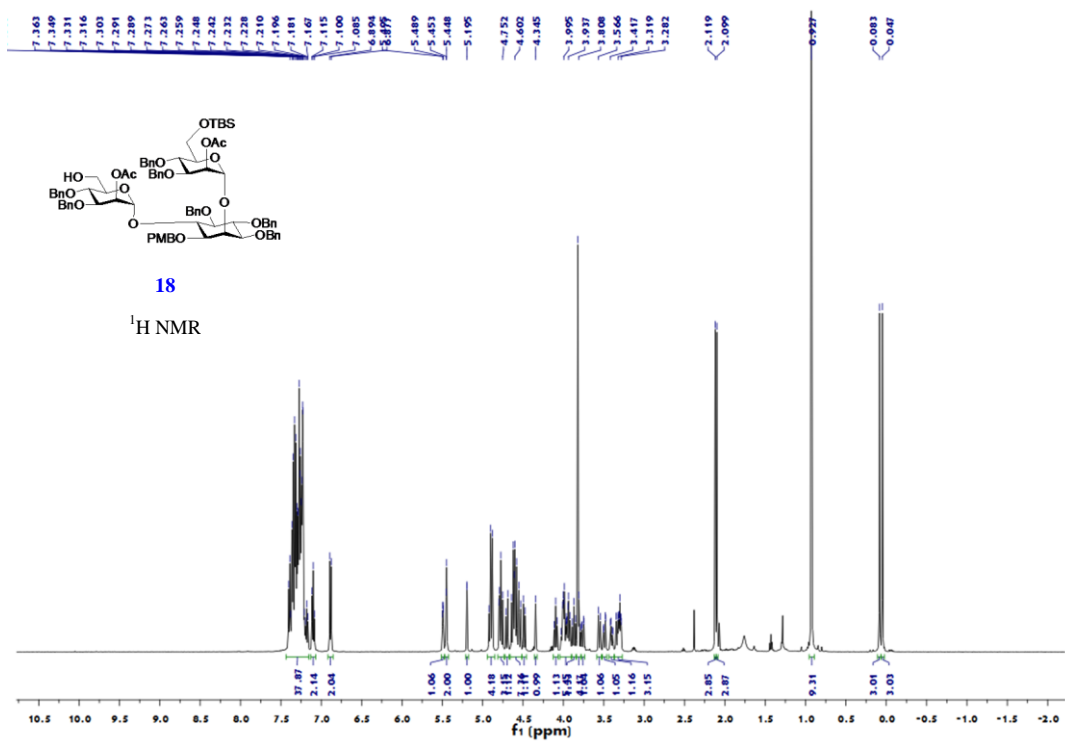

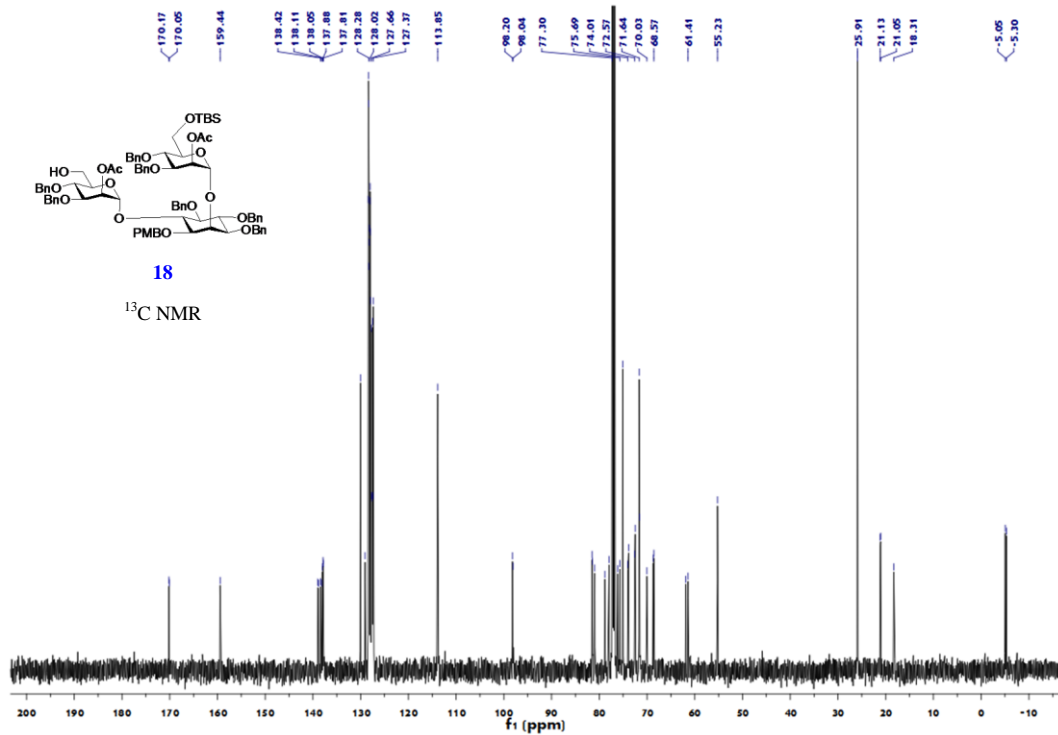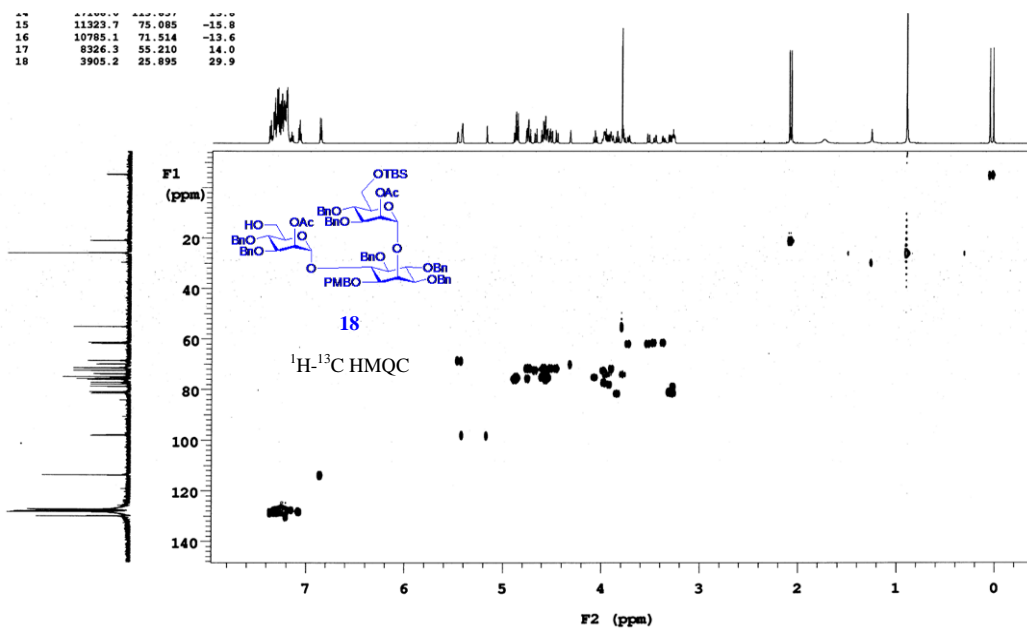

|    |         |         |       |
|----|---------|---------|-------|
| 1  | 17170.3 | 113.852 | -12.6 |
| 2  | 17168.0 | 113.937 | 22.3  |
| 3  | 14782.7 | 98.021  | 12.7  |
| 4  | 12278.5 | 81.416  | 14.2  |
| 5  | 12208.9 | 80.955  | 15.0  |
| 6  | 11886.9 | 78.819  | 14.5  |
| 7  | 11750.0 | 77.912  | 14.2  |
| 8  | 11654.1 | 77.276  | 15.0  |
| 9  | 11482.4 | 76.138  | -15.2 |
| 10 | 11412.3 | 75.673  | -19.3 |
| 11 | 11323.7 | 75.085  | -25.7 |
| 12 | 11136.3 | 73.842  | 14.2  |
| 13 | 10941.7 | 72.552  | 15.4  |
| 14 | 10927.1 | 72.455  | -19.8 |
| 15 | 10800.3 | 71.614  | -17.9 |
| 16 | 10785.1 | 71.514  | -22.1 |
| 17 | 10588.8 | 70.011  | 12.4  |
| 18 | 10363.3 | 68.717  | 14.8  |
| 19 | 10339.2 | 68.557  | 16.8  |
| 20 | 9328.8  | 61.857  | -15.4 |
| 21 | 9259.3  | 61.396  | -16.5 |
| 22 | 8326.3  | 55.210  | 22.7  |

Agilent 600 NMR spectrometer Standard\_proton

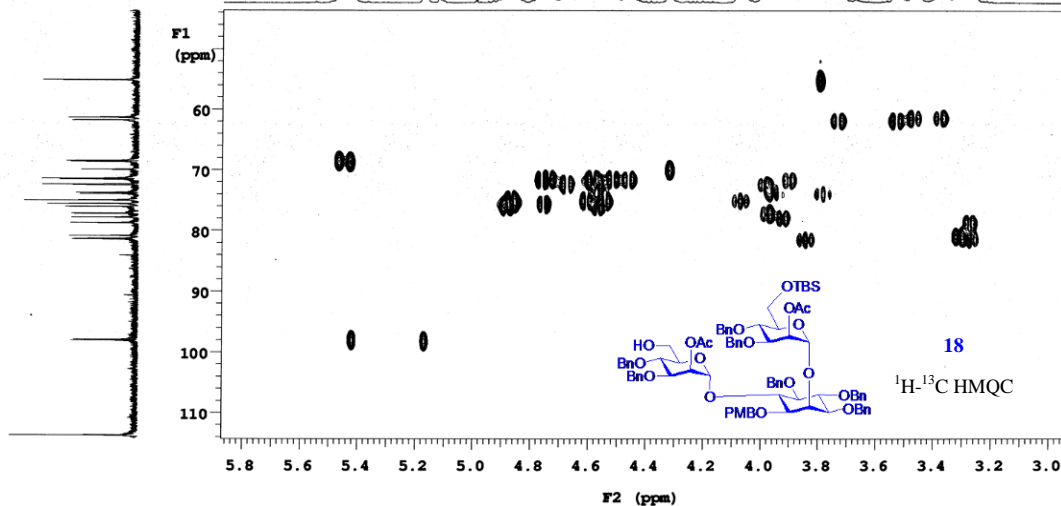

Agilent 600 NMR spectrometer

ys/probes/probe\_calibe

sc 7 2012

Agilent Technologies

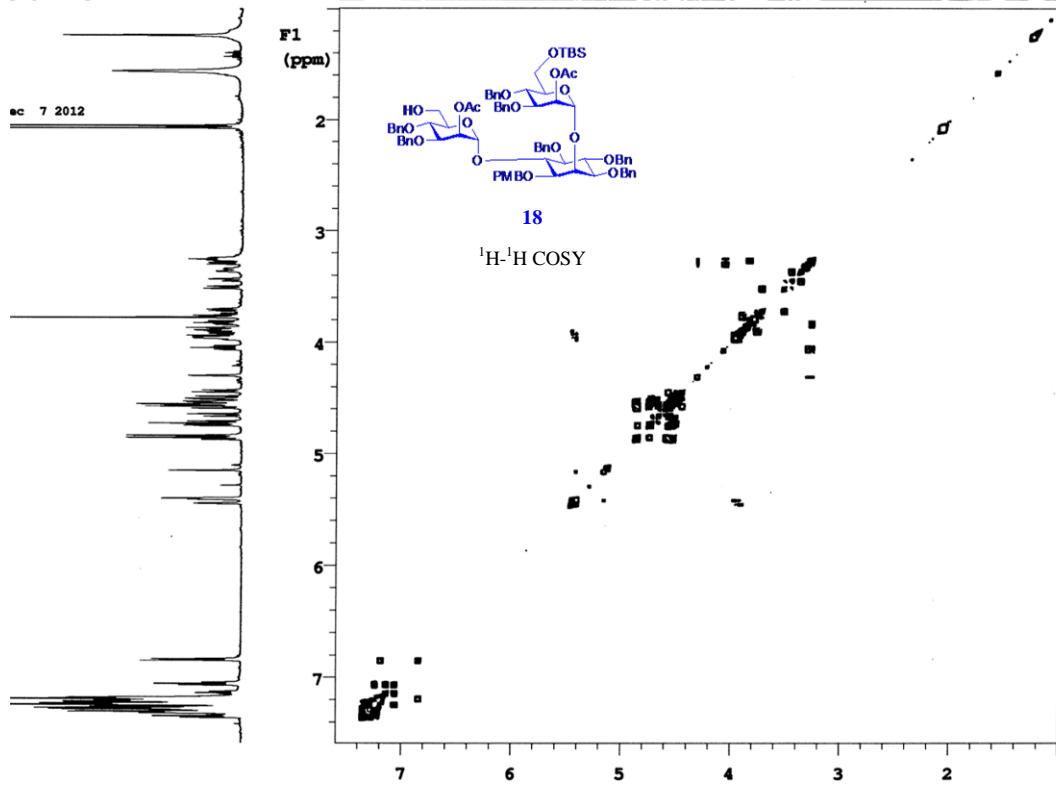

e Name:  
 Collected on:  
 0-vmr600  
 ve directory:  
 me/vmr1/vmrays/probes/probe\_calibs  
 e directory:  
 le: COSY  
 Sequence: COSY  
 t: cdc13  
 collected on: Dec 7 2012

Agilent 600 NMR spectrometer  
 Agilent Technologies

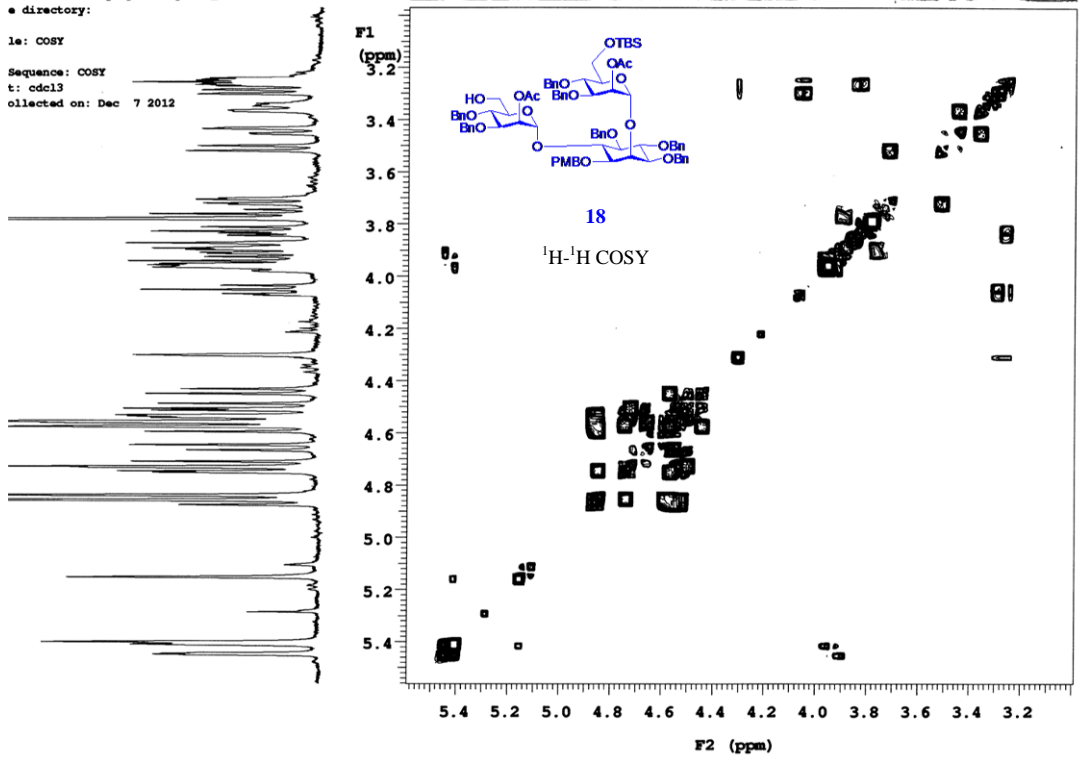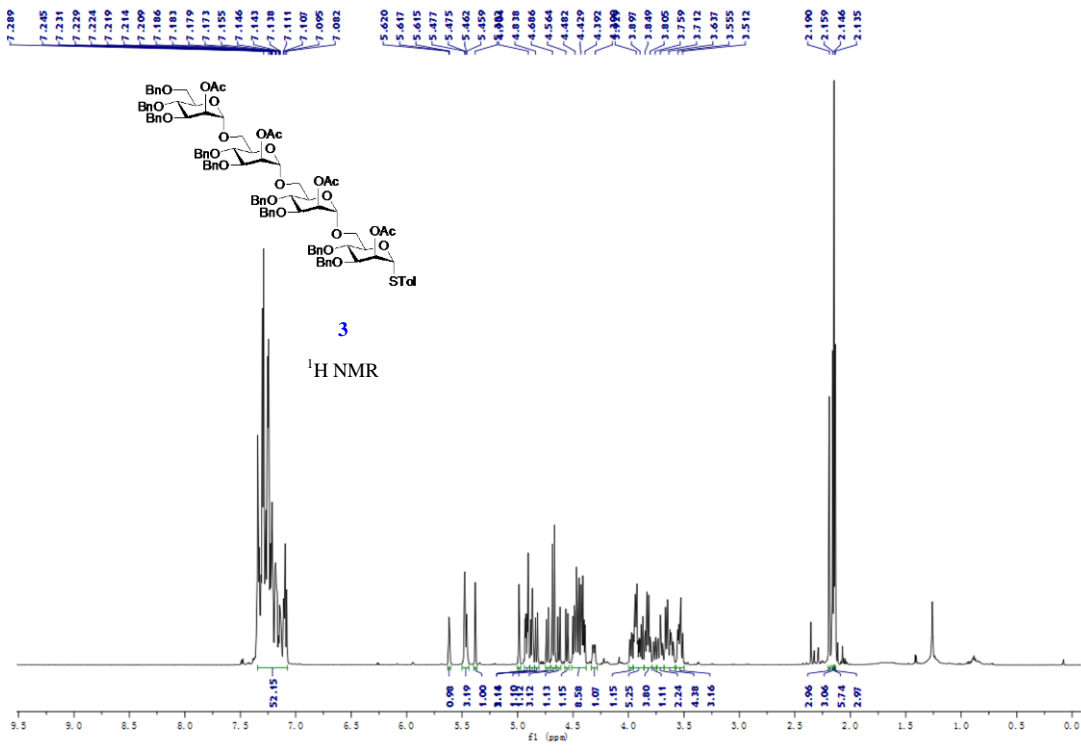

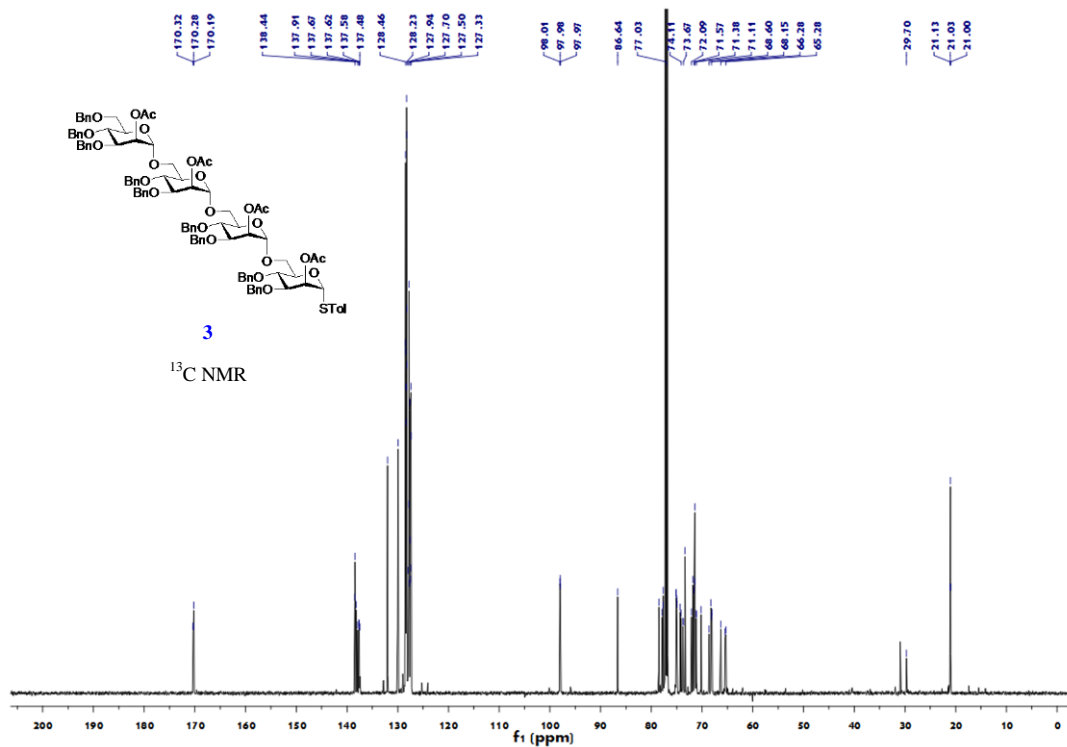

| 1 | 19380.0 | 128.504 | -21.6 |
|---|---------|---------|-------|
| 2 | 19377.2 | 128.486 | -14.6 |
| 3 | 19340.7 | 128.244 | 21.9  |
| 4 | 19336.8 | 128.218 | 18.8  |
| 5 | 19333.4 | 128.196 | 22.8  |
| 6 | 19270.6 | 127.779 | 20.9  |
| 7 | 19212.3 | 127.392 | 15.6  |
| 8 | 19203.8 | 127.336 | 17.4  |
| 9 | 3175.9  | 21.059  | 13.1  |

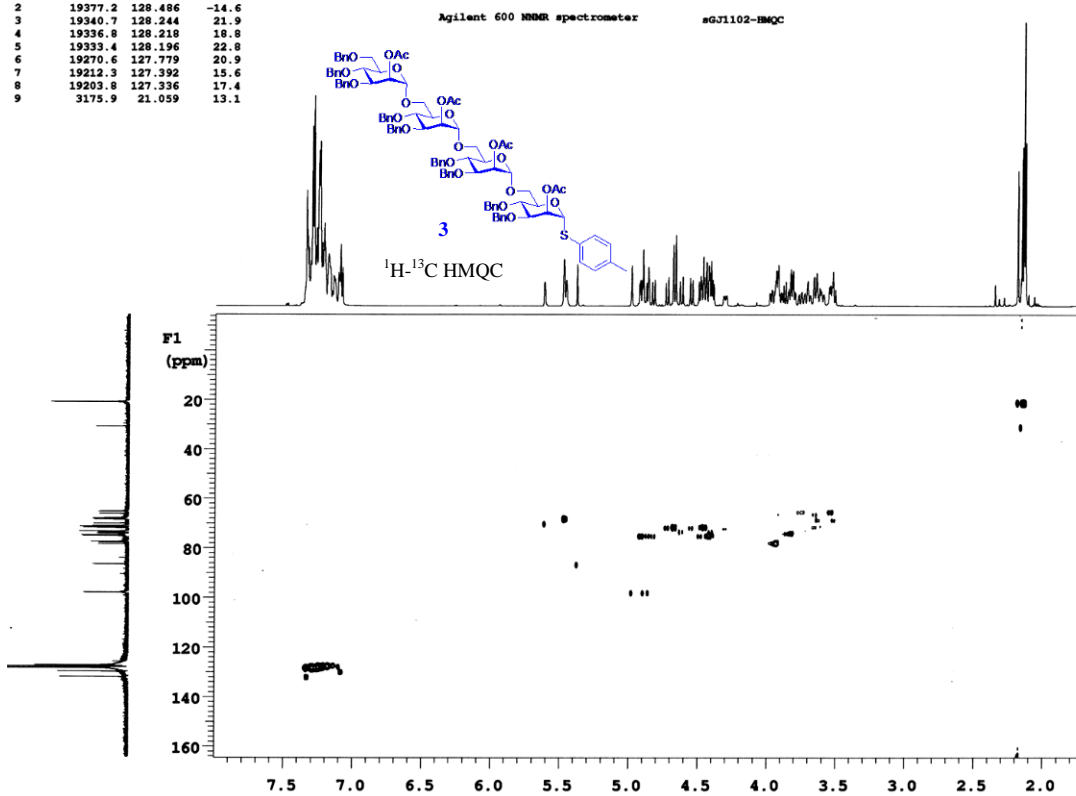

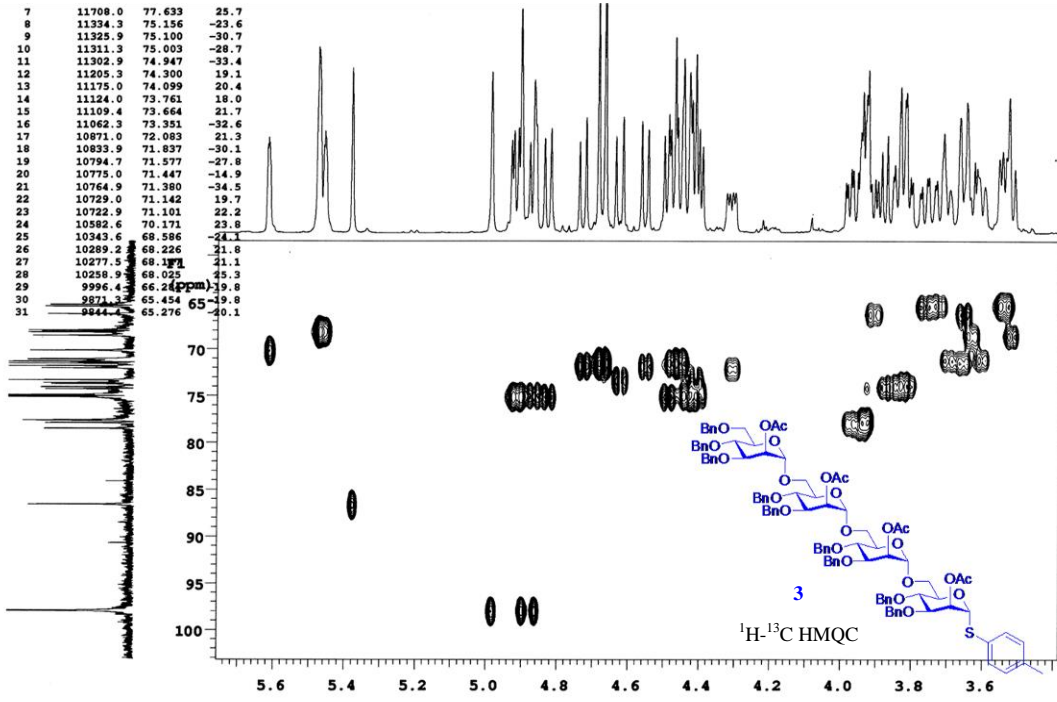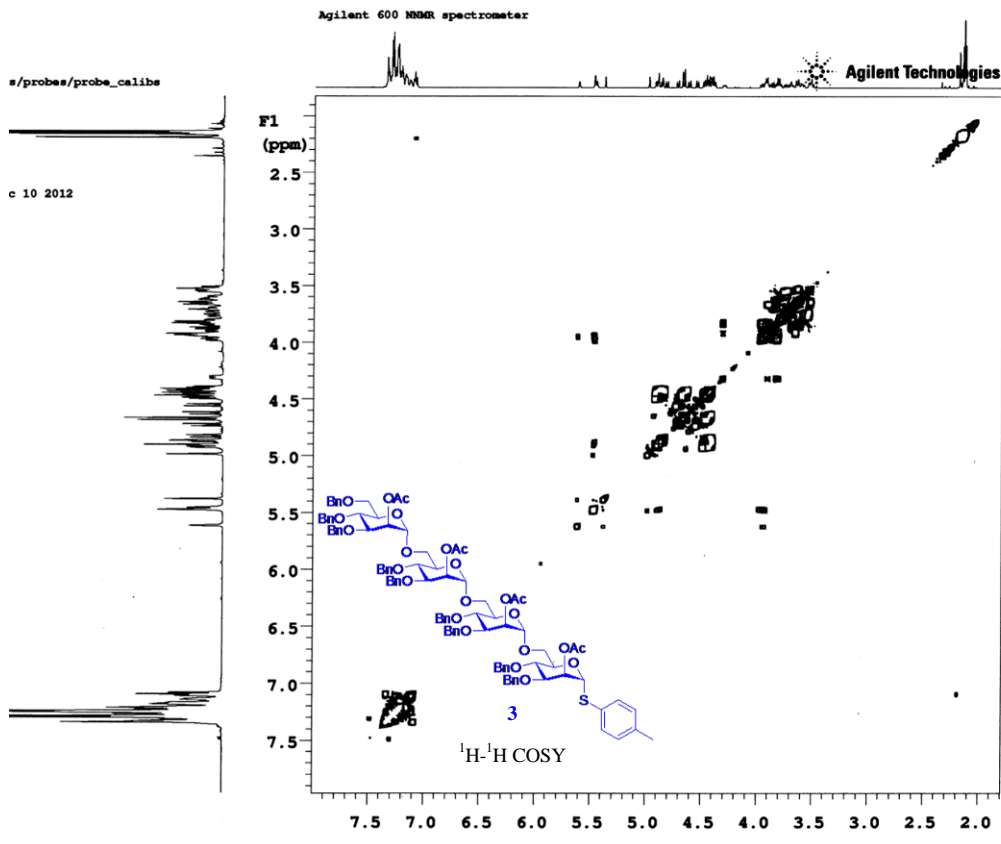

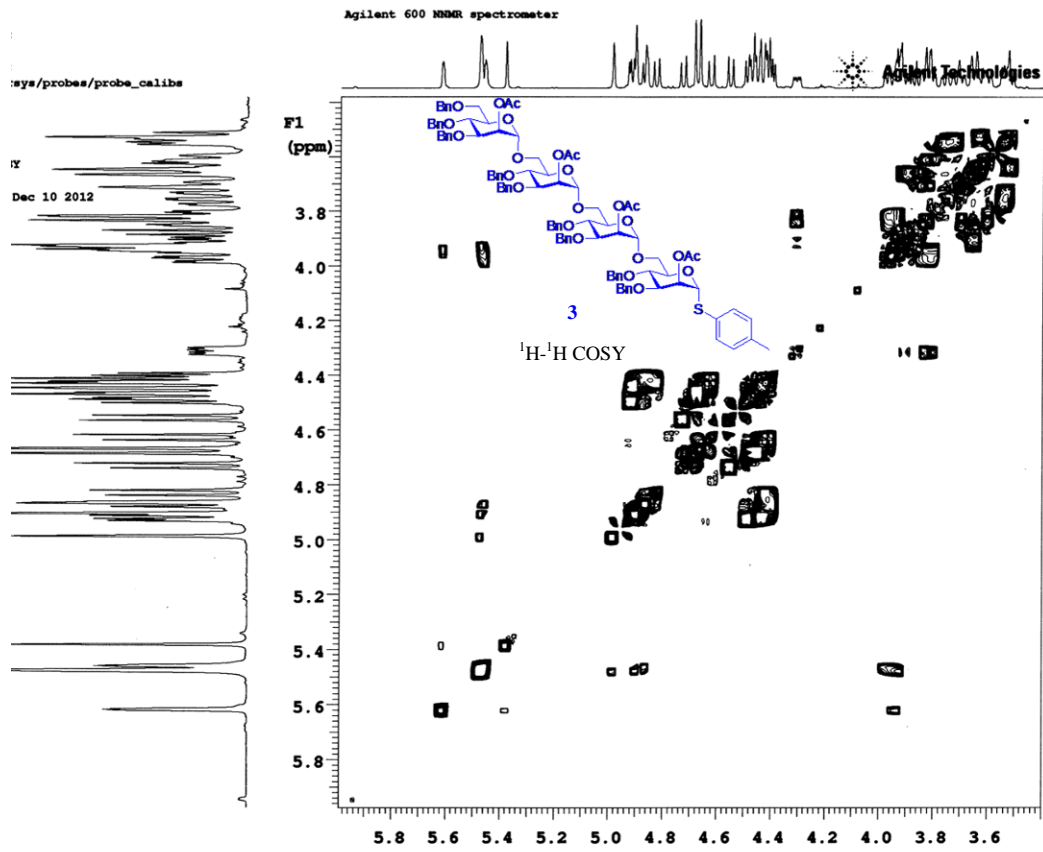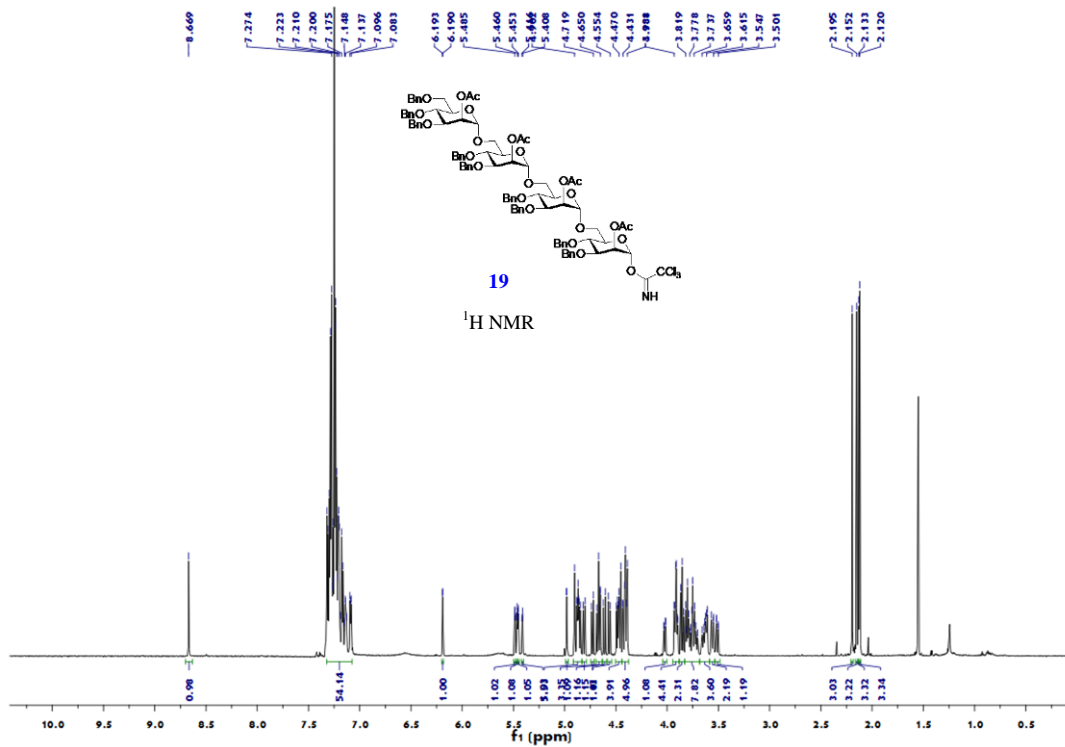



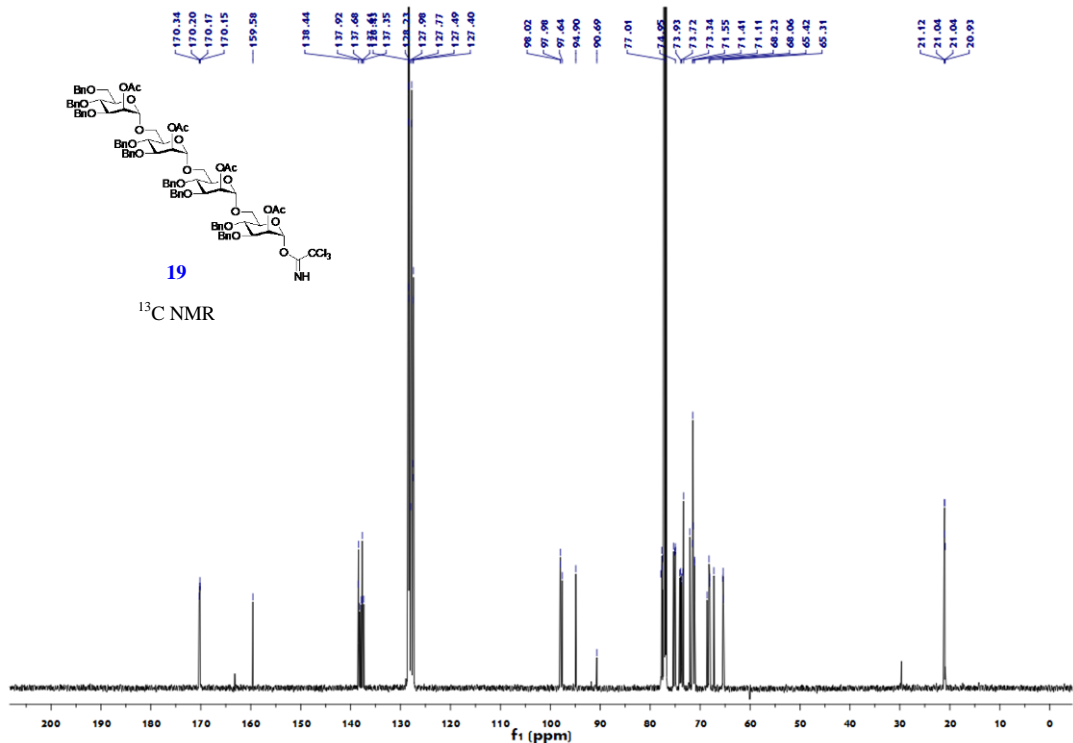

Sample Name:  
 Data Collected on: a600-vnars600  
 Archive directory: /home/vnars1/vnarsays/probes/probe\_calibs  
 Sample directory:  
 Fidfile: COSY  
 Pulse Sequence: COSY  
 Solvent: cdcl3  
 Data collected on: Dec 27 2012

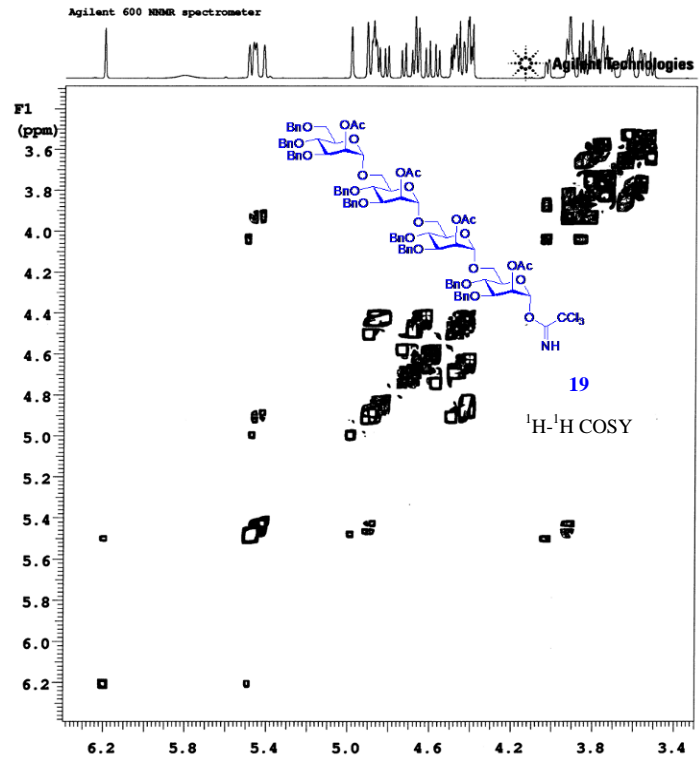

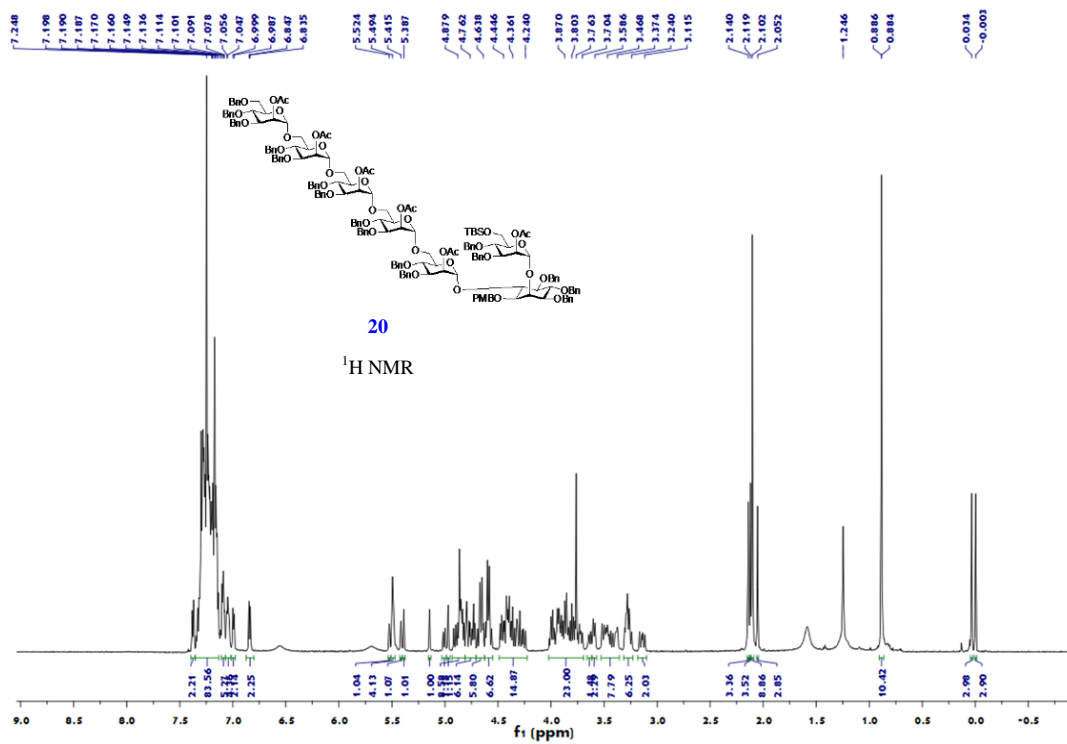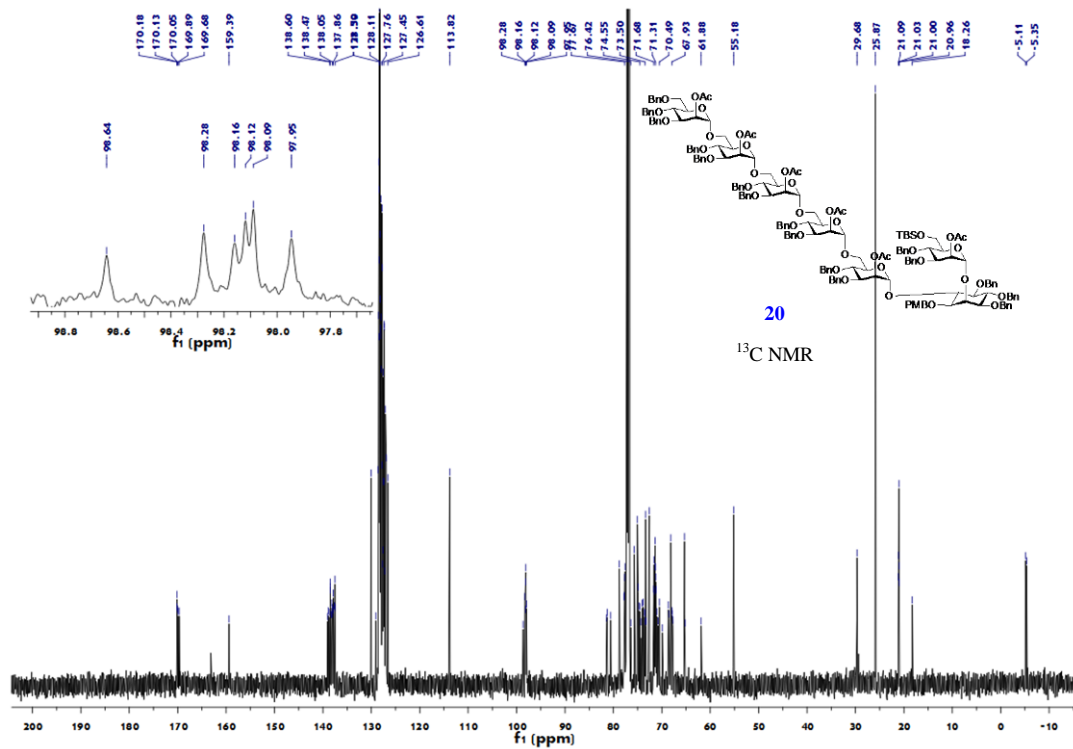

|    |         |         |       |
|----|---------|---------|-------|
| 1  | 19410.8 | 128.709 | -15.2 |
| 2  | 19389.0 | 128.564 | -24.2 |
| 3  | 19386.2 | 128.545 | -22.0 |
| 4  | 19381.7 | 128.516 | -28.0 |
| 5  | 19377.7 | 128.489 | -21.4 |
| 6  | 19371.0 | 128.445 | -17.5 |
| 7  | 19367.7 | 128.423 | -19.2 |
| 8  | 19362.0 | 128.385 | -26.2 |
| 9  | 19358.7 | 128.363 | -13.4 |
| 10 | 19350.8 | 128.311 | -31.4 |
| 11 | 19329.5 | 128.170 | -12.7 |
| 12 | 19325.0 | 128.140 | -12.9 |
| 13 | 19318.8 | 128.099 | -21.2 |
| 14 | 19279.6 | 127.839 | -20.9 |
| 15 | 19244.8 | 127.608 | -16.5 |
| 16 | 19210.6 | 127.361 | -15.3 |
| 17 | 3908.6  | 25.917  | 17.0  |

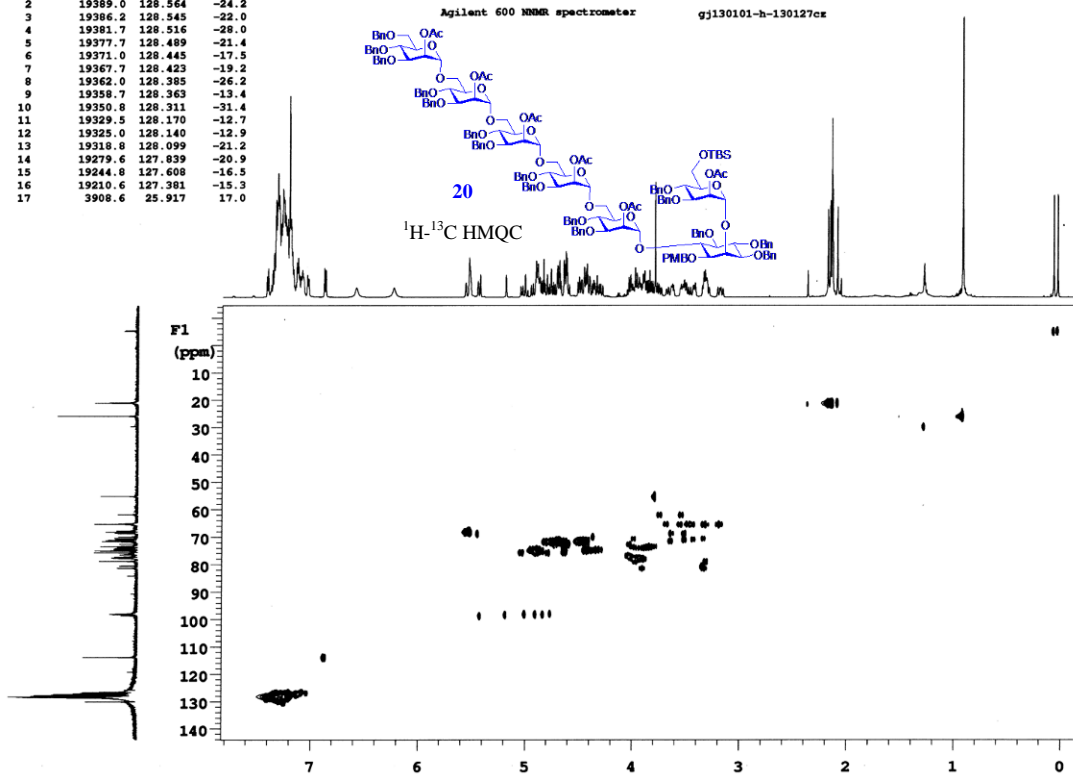

|    |         |        |       |
|----|---------|--------|-------|
| 1  | 14825.9 | 98.307 | -17.3 |
| 2  | 14809.1 | 98.196 | -18.1 |
| 3  | 14803.5 | 98.159 | -15.5 |
| 4  | 11989.2 | 78.634 | -19.6 |
| 5  | 11706.8 | 77.625 | 12.4  |
| 6  | 11424.7 | 75.754 | 25.1  |
| 7  | 11327.6 | 75.111 | 25.7  |
| 8  | 11322.0 | 75.074 | -12.9 |
| 9  | 11219.9 | 74.397 | -12.6 |
| 10 | 11172.8 | 74.084 | -13.2 |
| 11 | 11069.0 | 73.396 | 22.0  |
| 12 | 10949.0 | 72.600 | 13.2  |
| 13 | 10817.7 | 71.730 | 20.2  |
| 14 | 10810.9 | 71.685 | -13.5 |
| 15 | 10775.0 | 71.447 | 18.5  |
| 16 | 10753.2 | 71.302 | -18.0 |
| 17 | 10738.6 | 71.205 | -18.5 |
| 18 | 10639.8 | 70.550 | -12.6 |
| 19 | 10291.5 | 68.240 | -15.0 |
| 20 | 10285.9 | 68.203 | 14.5  |
| 21 | 9859.0  | 65.373 | 18.9  |
| 22 | 9852.8  | 65.332 | -16.6 |
| 23 | 8326.3  | 55.210 | 18.6  |

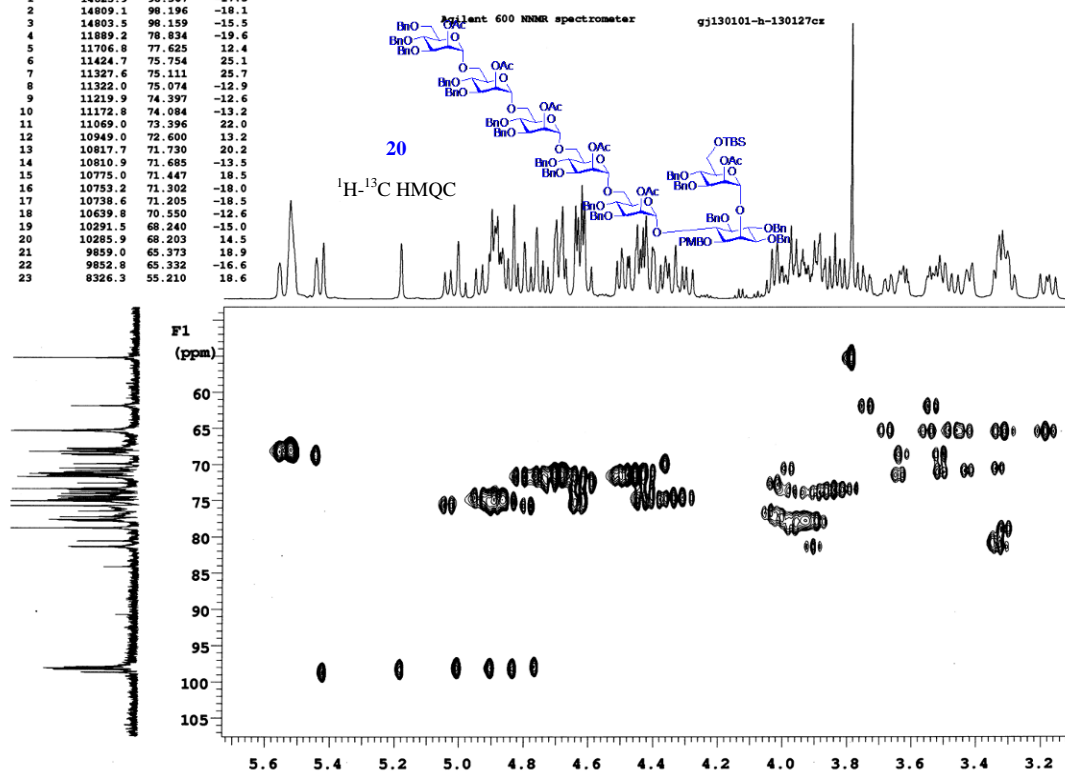

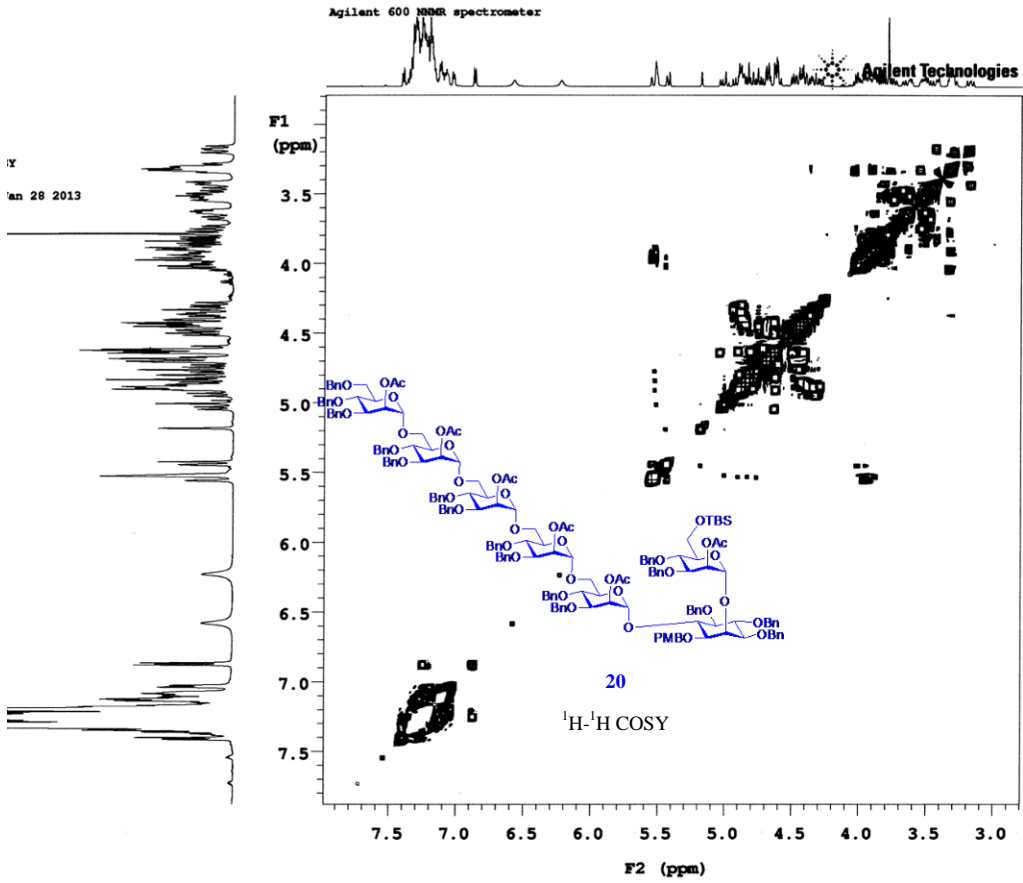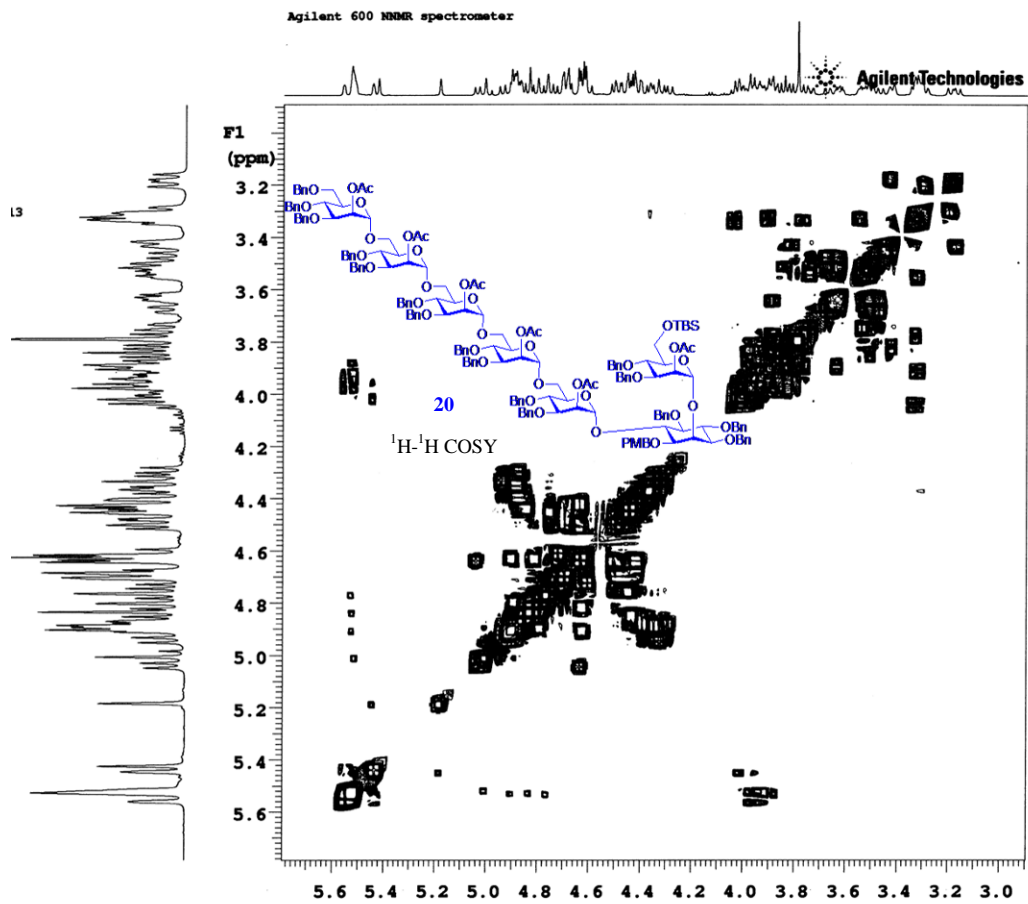

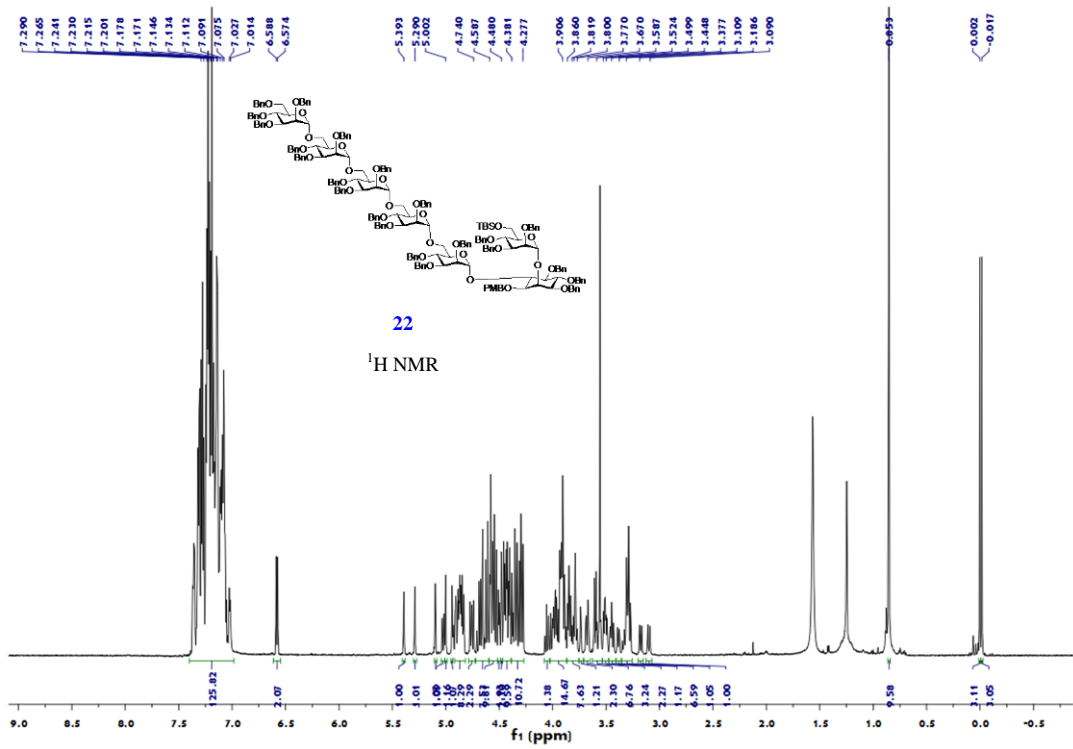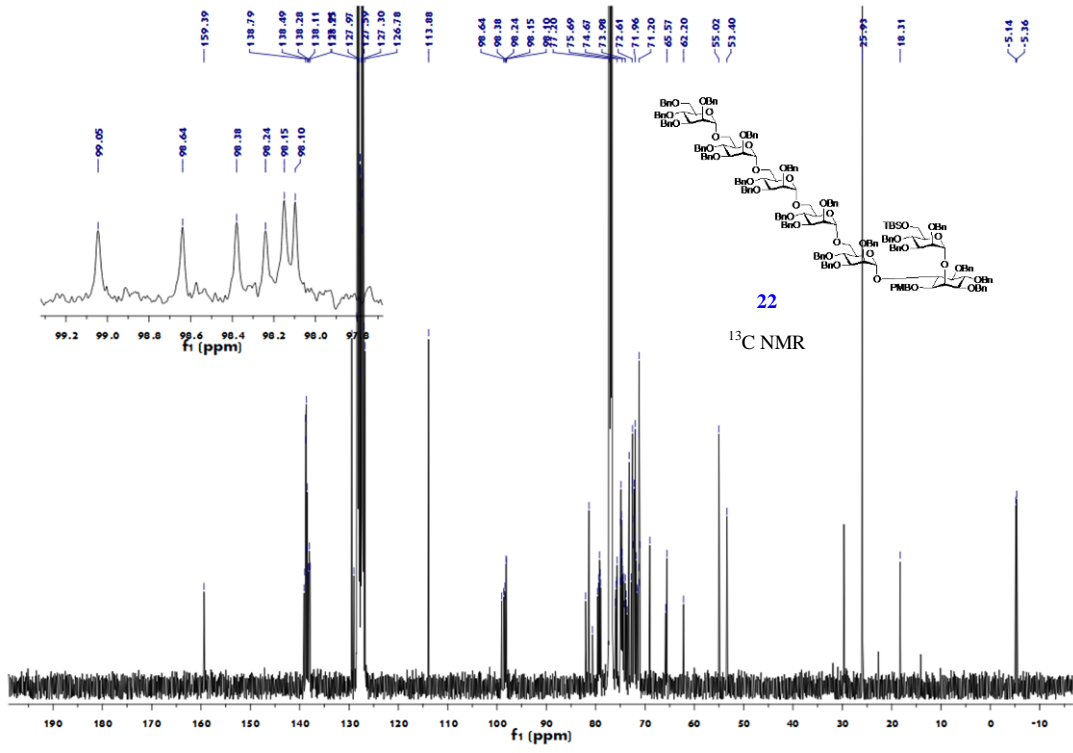

|   |         |         |      |
|---|---------|---------|------|
| 2 | 19340.7 | 128.244 | 14.8 |
| 3 | 19329.5 | 128.170 | 26.0 |
| 4 | 19322.8 | 128.125 | 20.9 |
| 5 | 19312.7 | 128.058 | 35.0 |
| 6 | 19302.6 | 127.991 | 17.5 |
| 7 | 19222.9 | 127.463 | 27.9 |
| 8 | 19210.0 | 127.377 | 14.8 |
| 9 | 19172.4 | 127.128 | 13.6 |

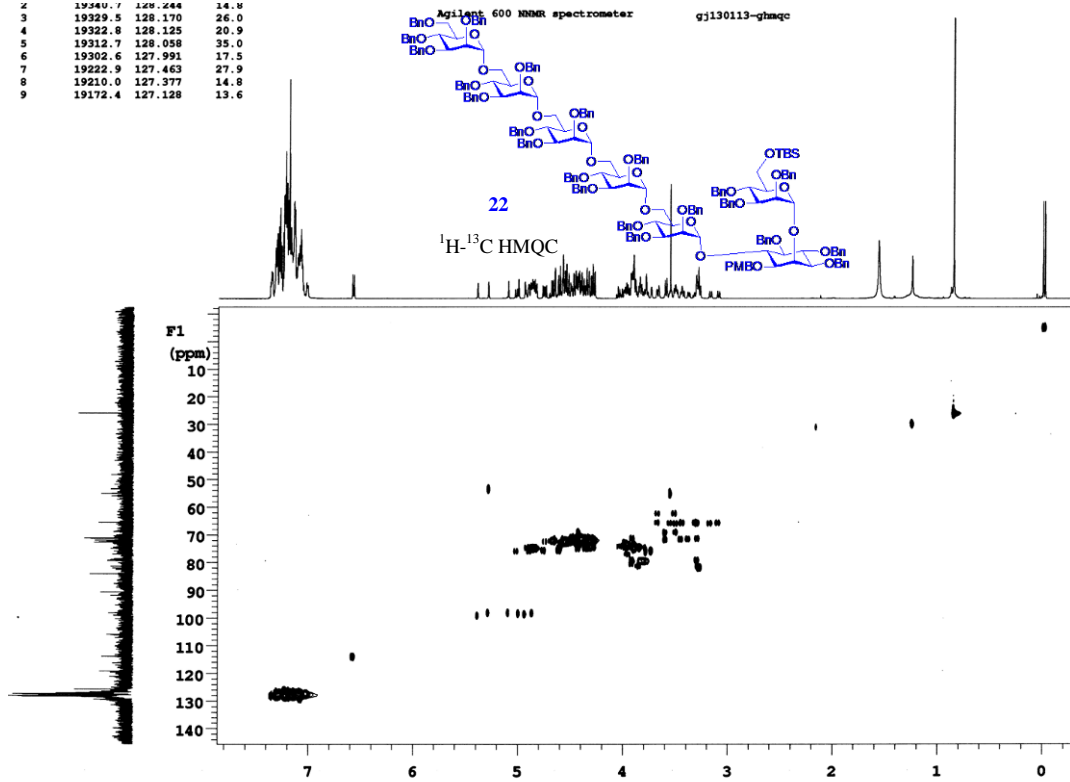

|    |         |         |       |
|----|---------|---------|-------|
| 1  | 16013.5 | 106.182 | 12.9  |
| 2  | 15984.9 | 105.922 | -15.9 |
| 3  | 14939.8 | 99.062  | 13.8  |
| 4  | 14804.0 | 98.162  | 14.4  |
| 5  | 13866.6 | 91.947  | -15.6 |
| 6  | 13683.8 | 90.734  | 21.1  |
| 7  | 13225.4 | 87.695  | 12.6  |
| 8  | 12692.5 | 84.161  | -17.7 |
| 9  | 12690.2 | 84.146  | 15.9  |
| 10 | 12272.3 | 81.375  | 13.8  |
| 11 | 11972.2 | 79.385  | 16.8  |
| 12 | 11944.7 | 79.203  | 14.0  |
| 13 | 11899.8 | 78.905  | -15.5 |
| 14 | 11433.6 | 75.814  | -12.4 |
| 15 | 11302.9 | 74.947  | -15.1 |
| 16 | 11242.3 | 74.545  | -13.5 |
| 17 | 11044.9 | 73.236  | -13.9 |
| 18 | 10955.1 | 72.641  | -27.3 |
| 19 | 10938.3 | 72.529  | -20.2 |
| 20 | 10851.3 | 71.953  | 17.8  |
| 21 | 10742.5 | 71.231  | -30.4 |
| 22 | 10615.2 | 70.387  | 12.5  |
| 23 | 9883.6  | 65.536  | 16.4  |
| 24 | 8436.3  | 55.939  | -15.6 |
| 25 | 8300.3  | 55.039  | -17.3 |

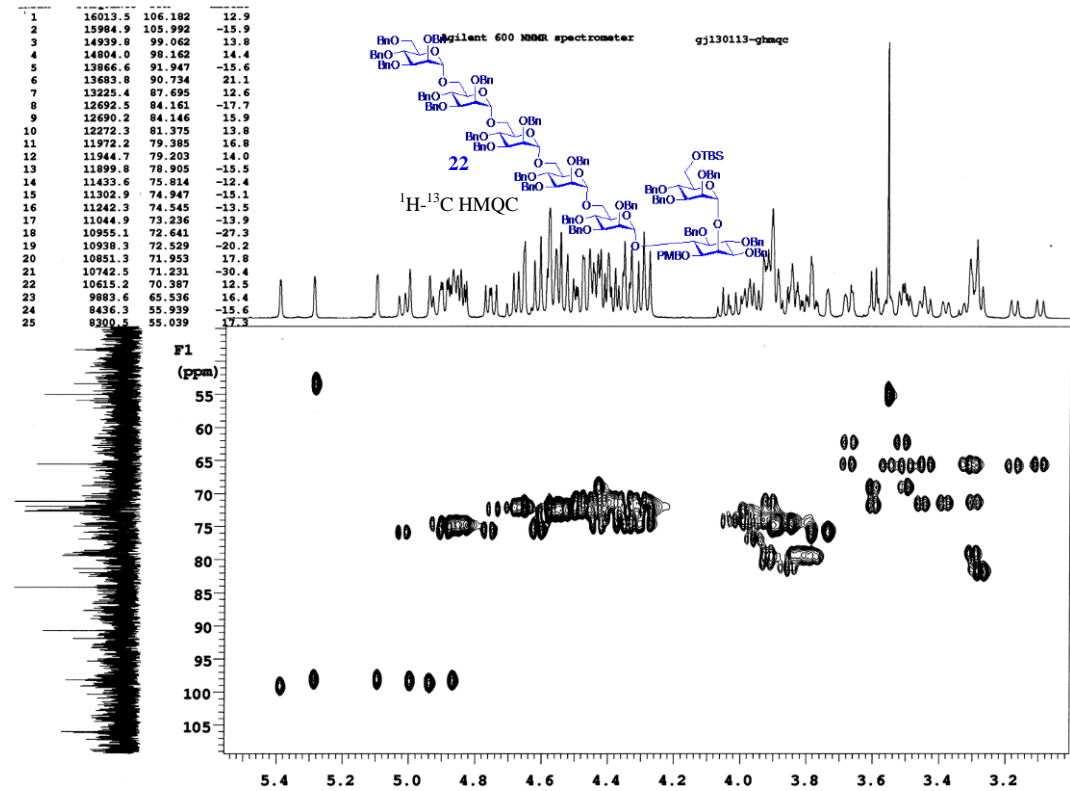

NO:  
 scted on:  
 srs600  
 irectory:  
 xar1/vmarsys/probes/probe\_calibe  
 rectorry:  
 yCOSY  
 mce: gCOSY  
 lc13  
 ted on: Jan 12 2013

Agilent 600 NMR spectrometer

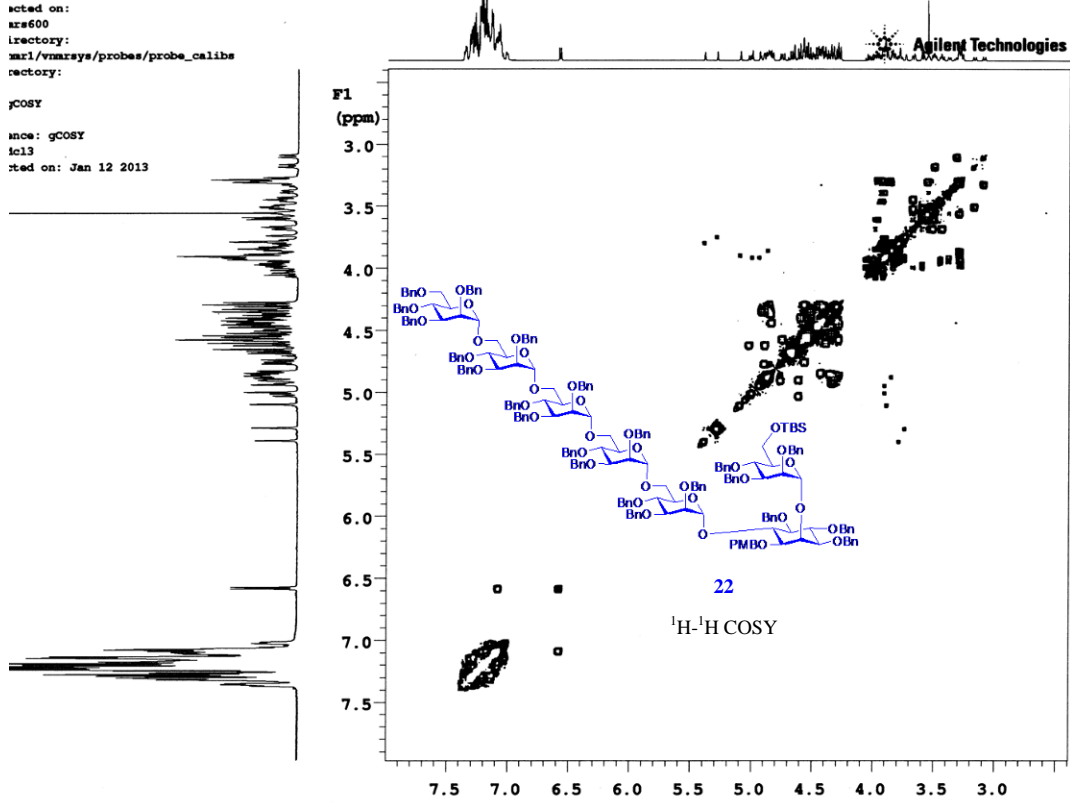

Agilent 600 NMR spectrometer

es/probe\_calibe

013

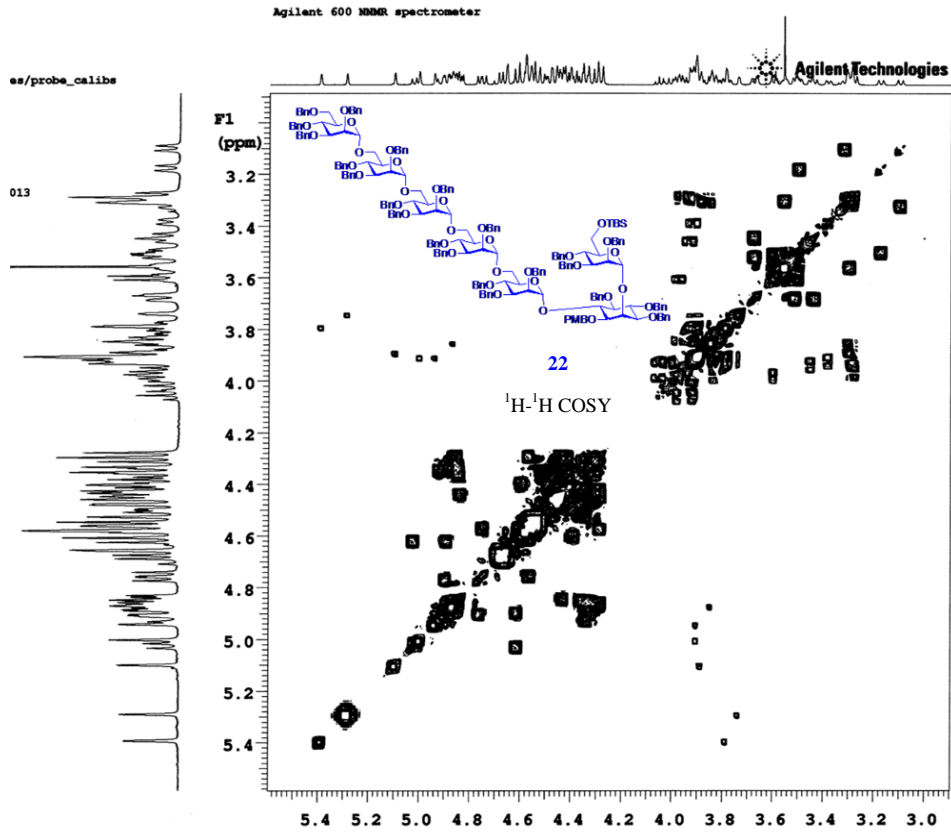





|    |         |         |      |
|----|---------|---------|------|
| 1  | 19364.8 | 128.404 | 13.8 |
| 2  | 19359.8 | 128.370 | 23.8 |
| 3  | 19348.0 | 128.292 | 14.5 |
| 4  | 19341.8 | 128.251 | 13.0 |
| 5  | 19331.2 | 128.181 | 33.8 |
| 6  | 19325.6 | 128.144 | 26.0 |
| 7  | 19320.5 | 128.110 | 14.4 |
| 8  | 19315.5 | 128.077 | 30.9 |
| 9  | 19308.7 | 128.032 | 18.7 |
| 10 | 19254.3 | 127.671 | 15.5 |
| 11 | 19222.4 | 127.459 | 33.3 |
| 12 | 19213.9 | 127.403 | 19.7 |
| 13 | 19178.0 | 127.165 | 14.7 |

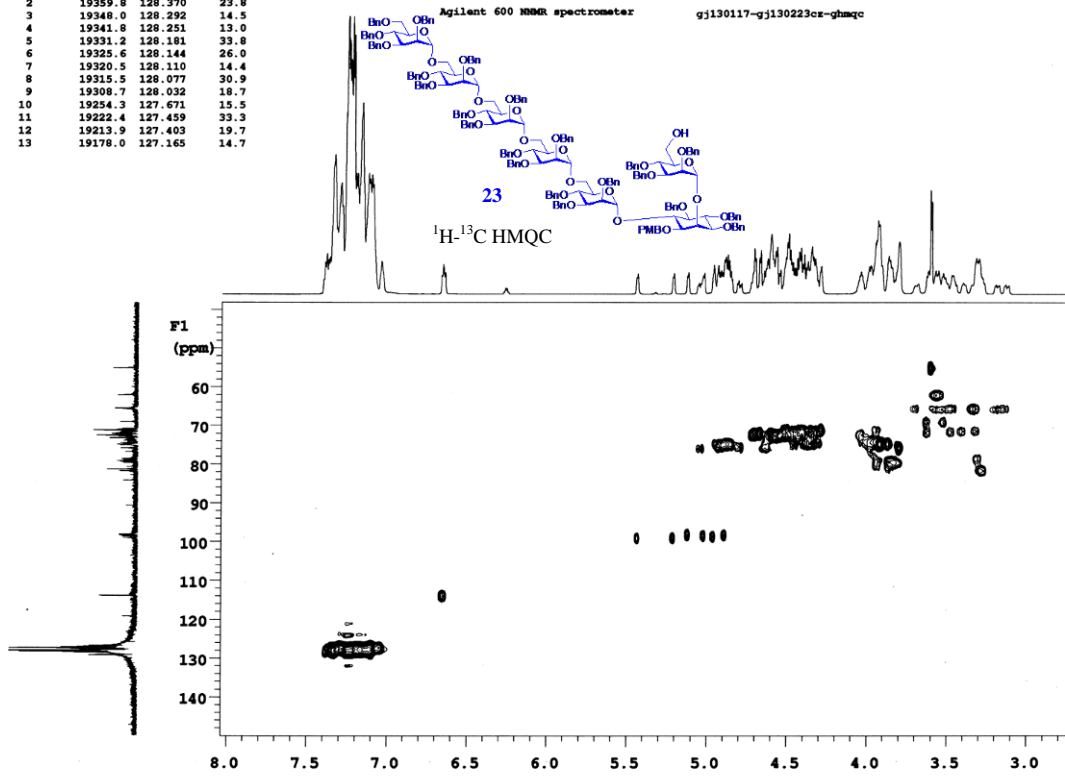

|    |         |        |       |
|----|---------|--------|-------|
| 7  | 11240.7 | 74.288 | -13.2 |
| 8  | 11047.1 | 73.251 | -21.4 |
| 9  | 10987.1 | 72.853 | -14.7 |
| 10 | 10956.8 | 72.652 | -23.8 |
| 11 | 10942.2 | 72.555 | -25.6 |
| 12 | 10828.3 | 71.800 | 14.3  |
| 13 | 10745.9 | 71.253 | -32.5 |
| 14 | 10739.1 | 71.209 | 16.3  |
| 15 | 8310.6  | 55.106 | 12.8  |

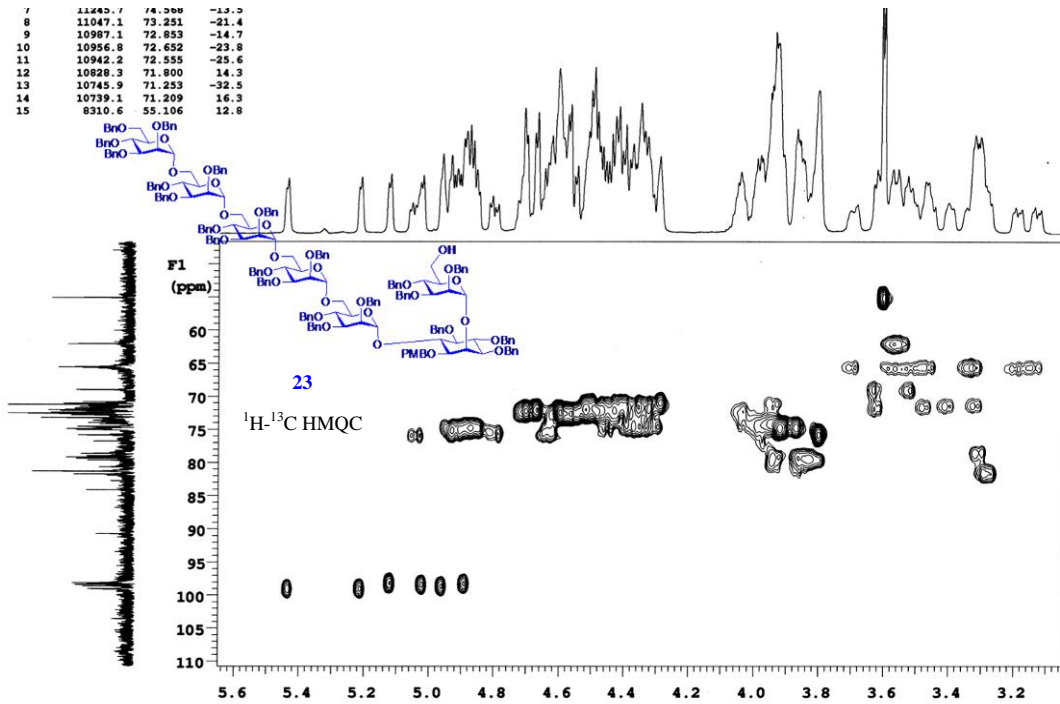

ed on:  
600  
ctory:  
1/vmrays/probes/probe\_calibs  
tory:

SY

e: gCOSY  
3  
d on: Jan 20 2013

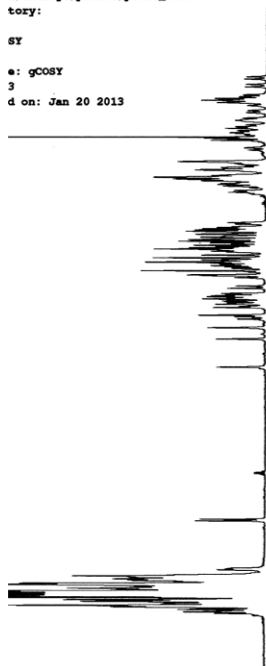

Agilent 600 NMR spectrometer

Agilent Technologies

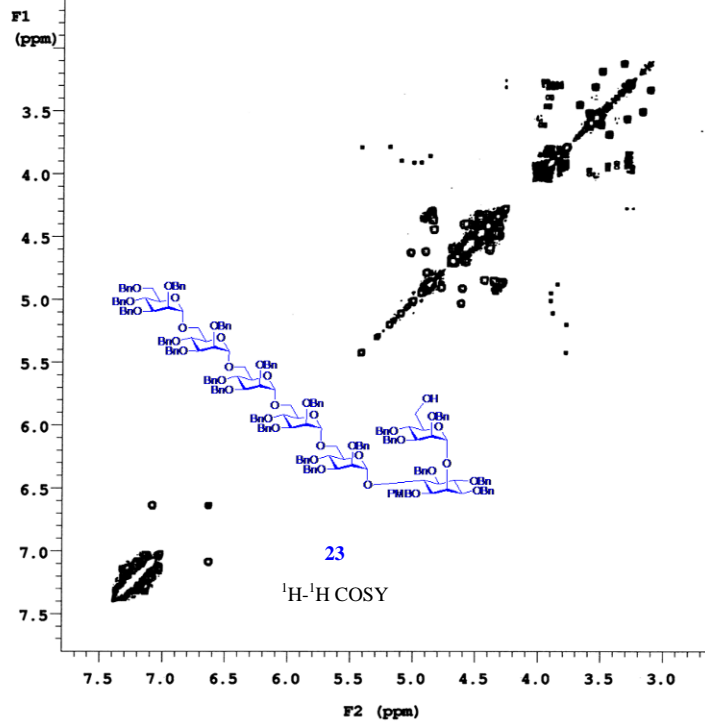

robes/probe\_calibs

0 2013

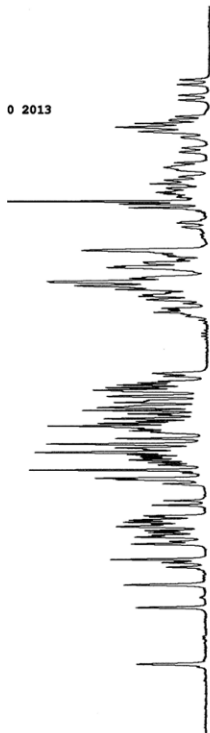

Agilent 600 NMR spectrometer

Agilent Technologies

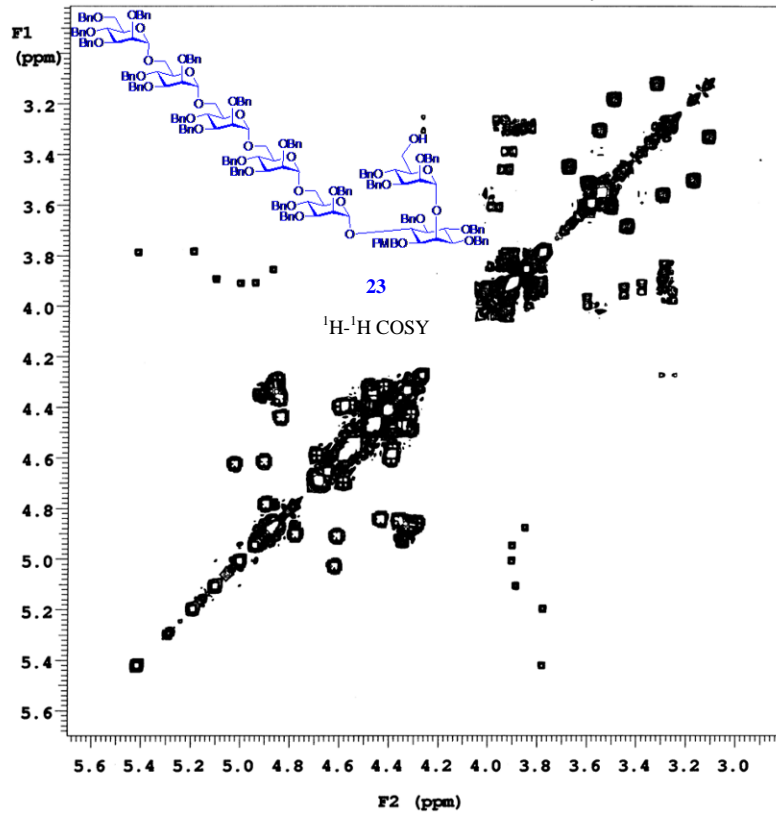

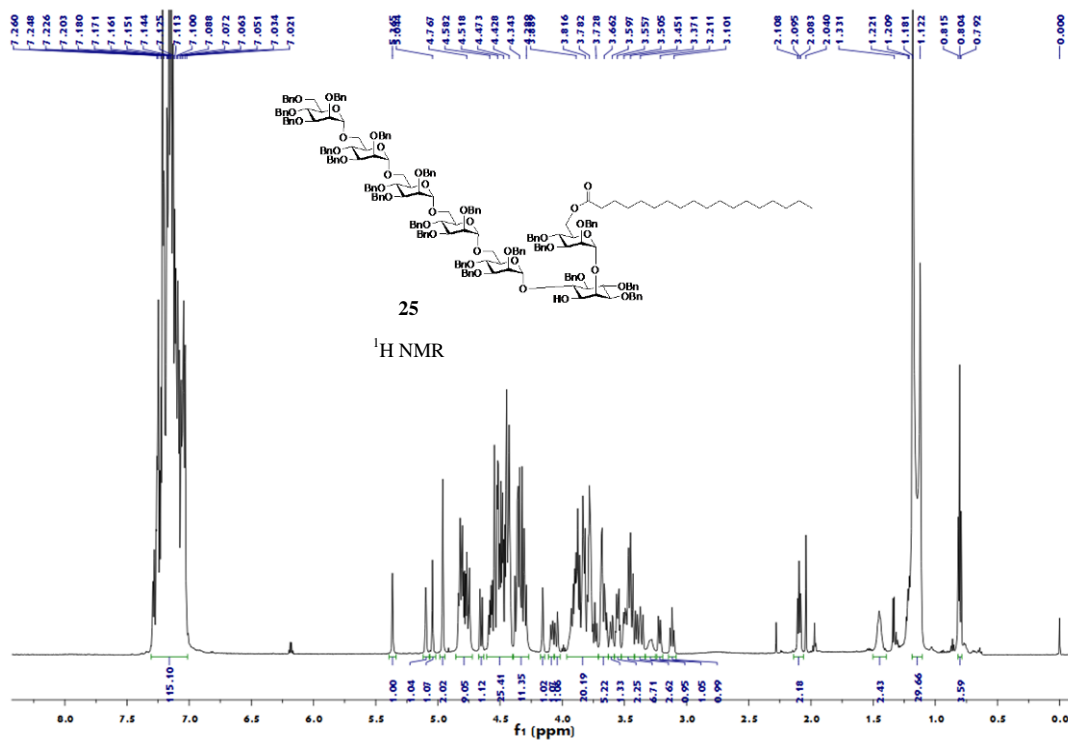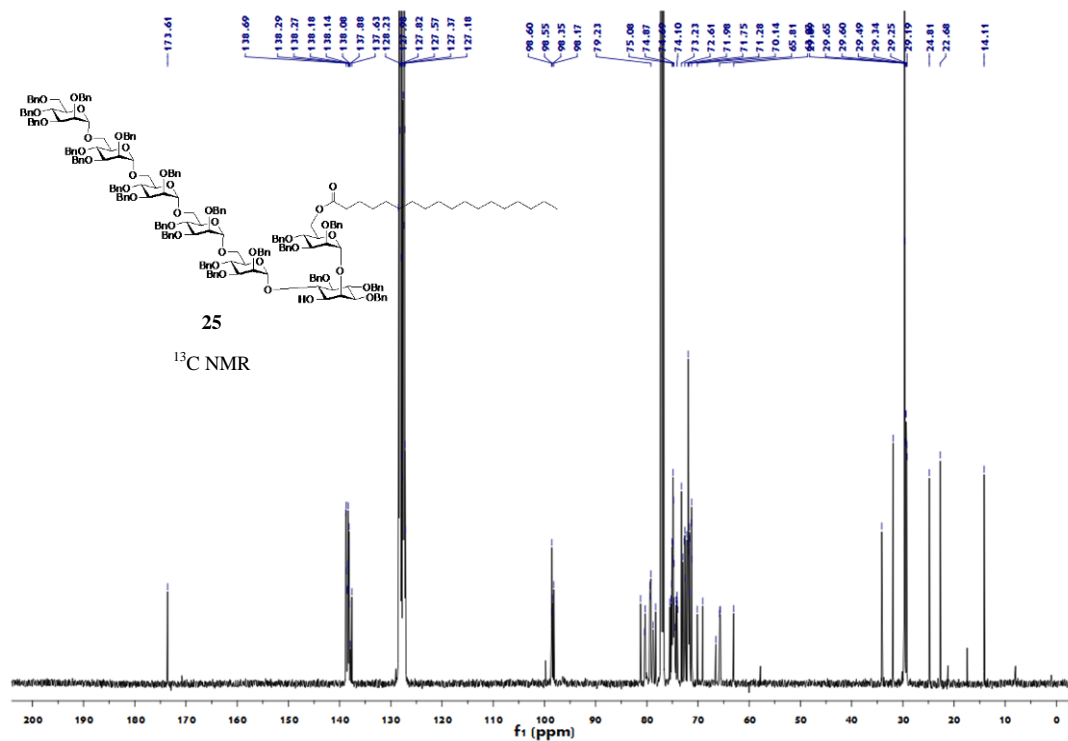

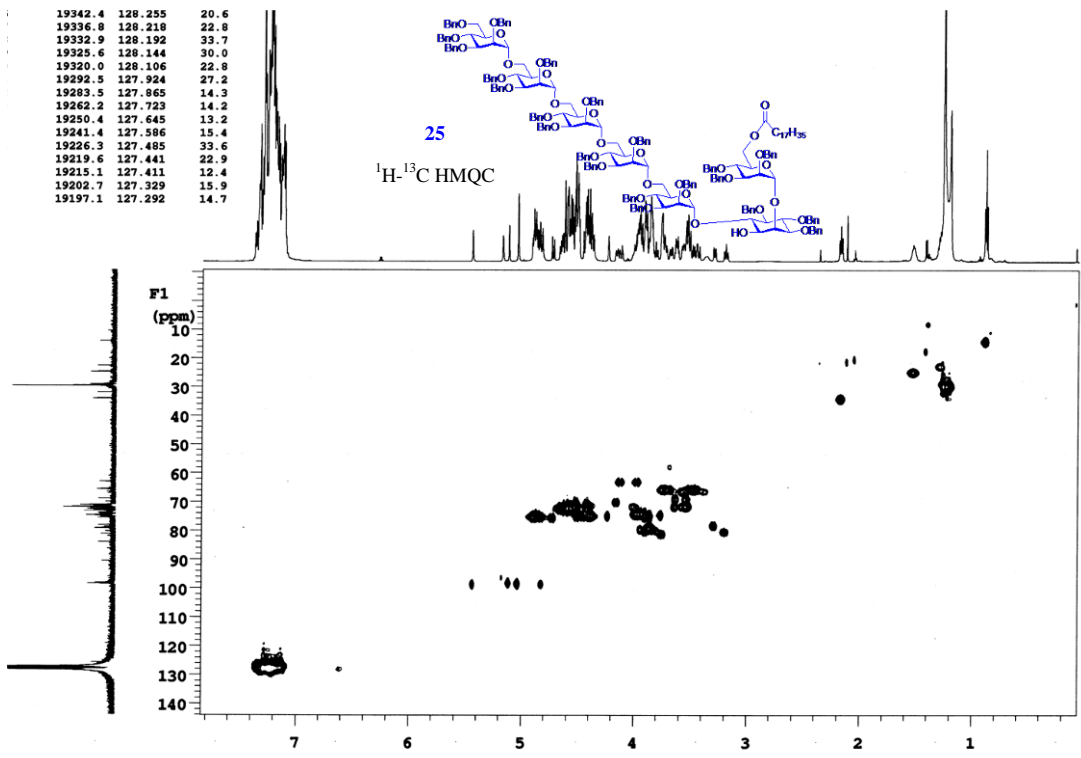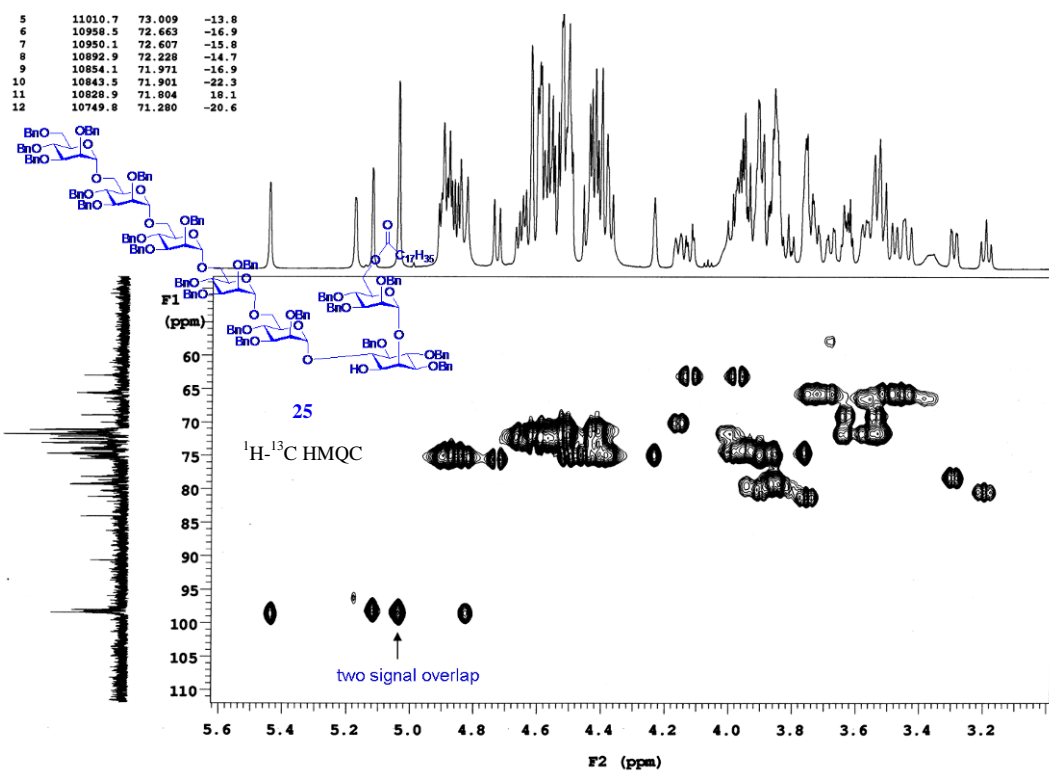

probes/probe\_calibs

1 2013

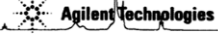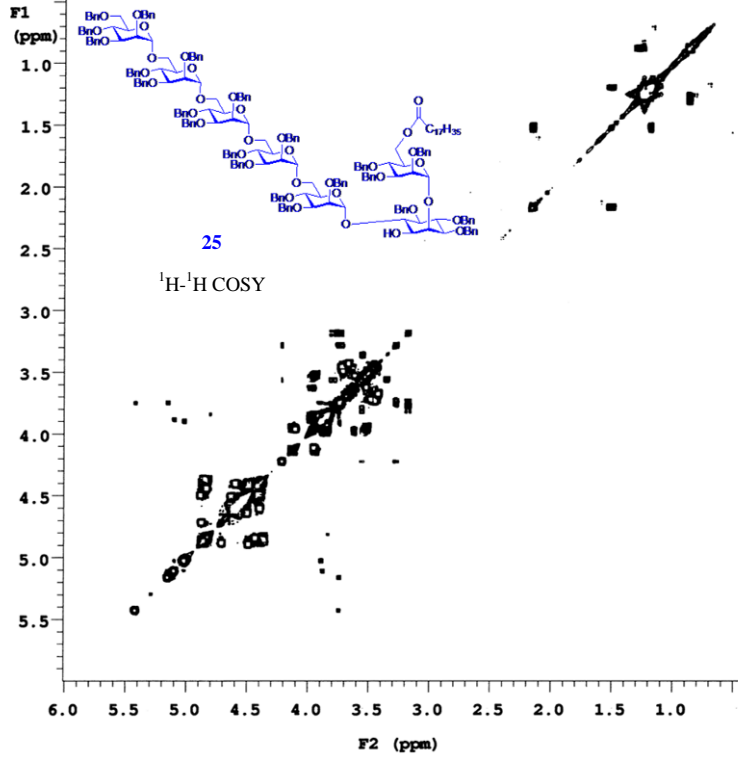

Name:  
 ollected on:  
 -nmars600  
 irectory:  
 /vnmr1/vnmrsys/probes/probe\_calibs  
 irectory:  
 : gCOSY  
 equence: gCOSY  
 cdcl3  
 lected on: Jan 31 2013

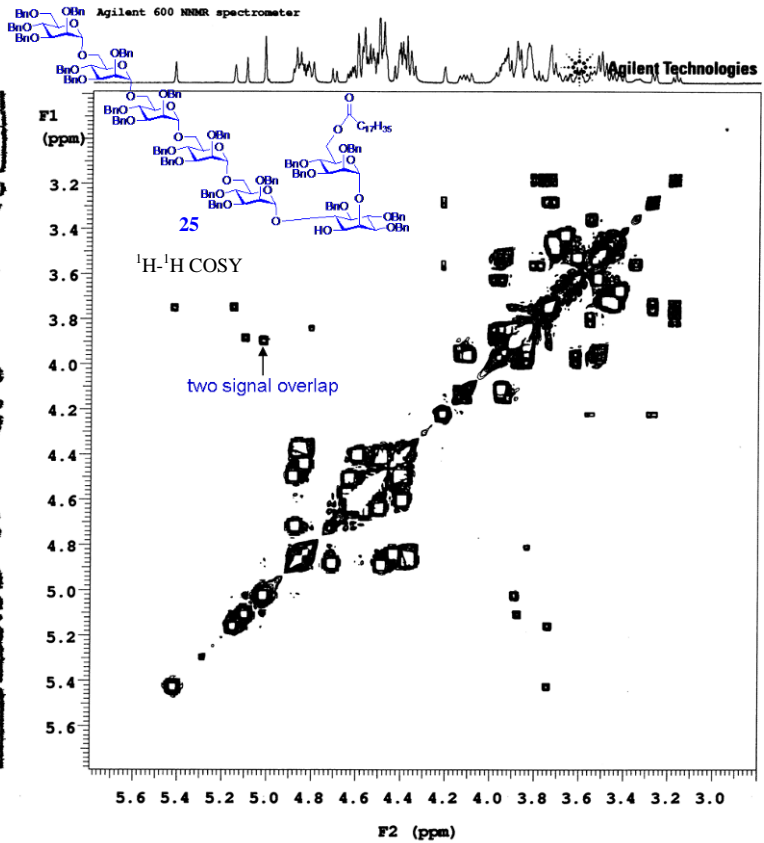

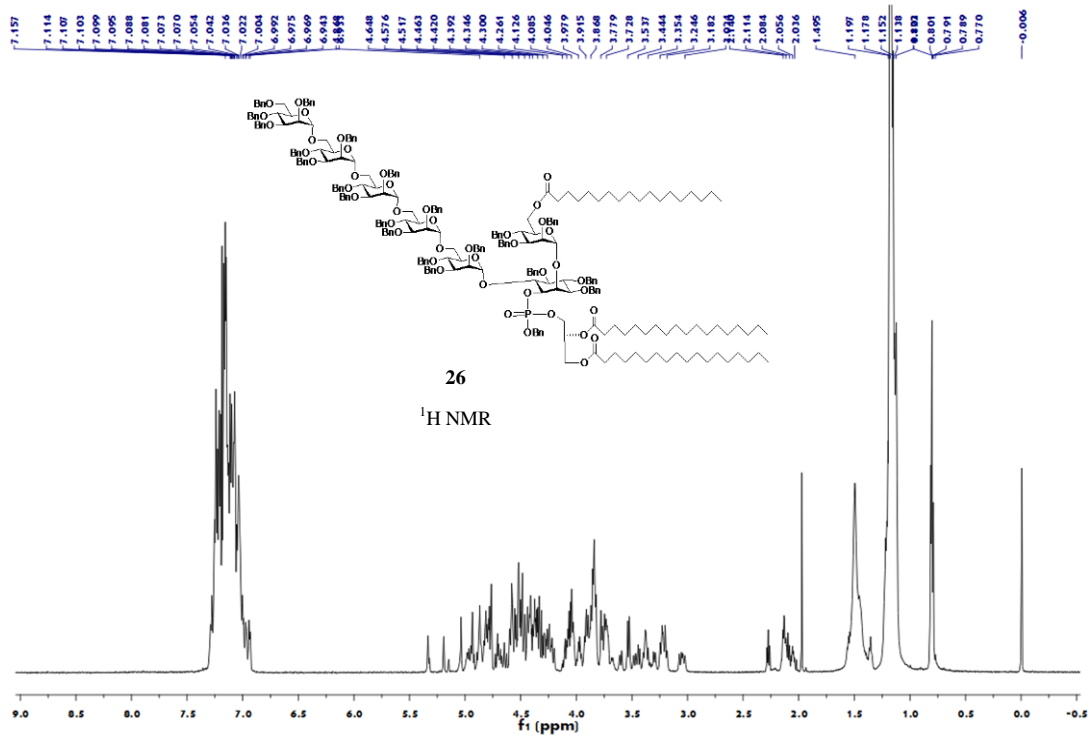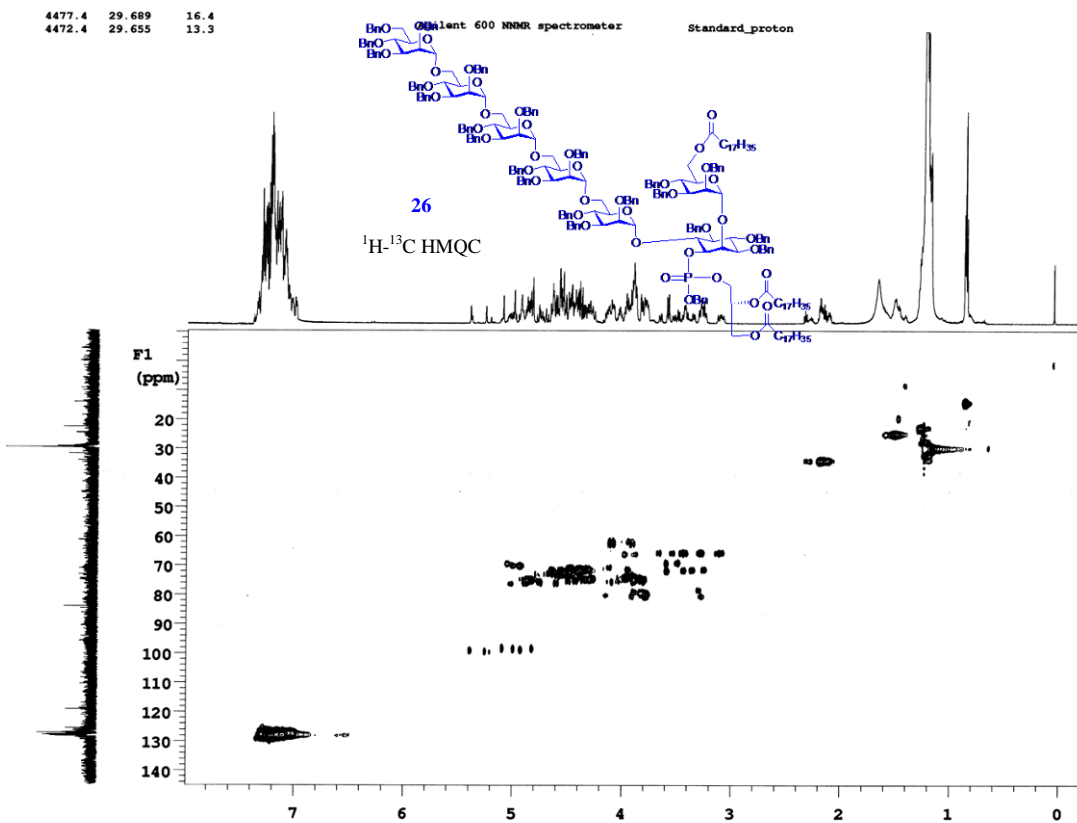

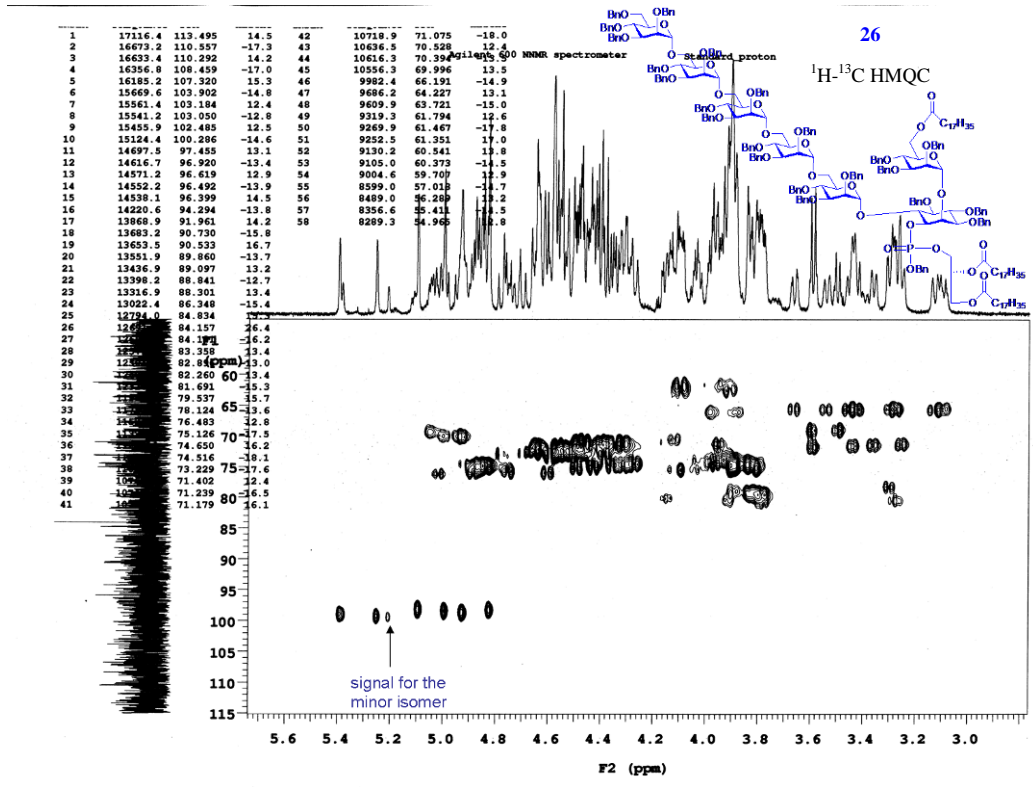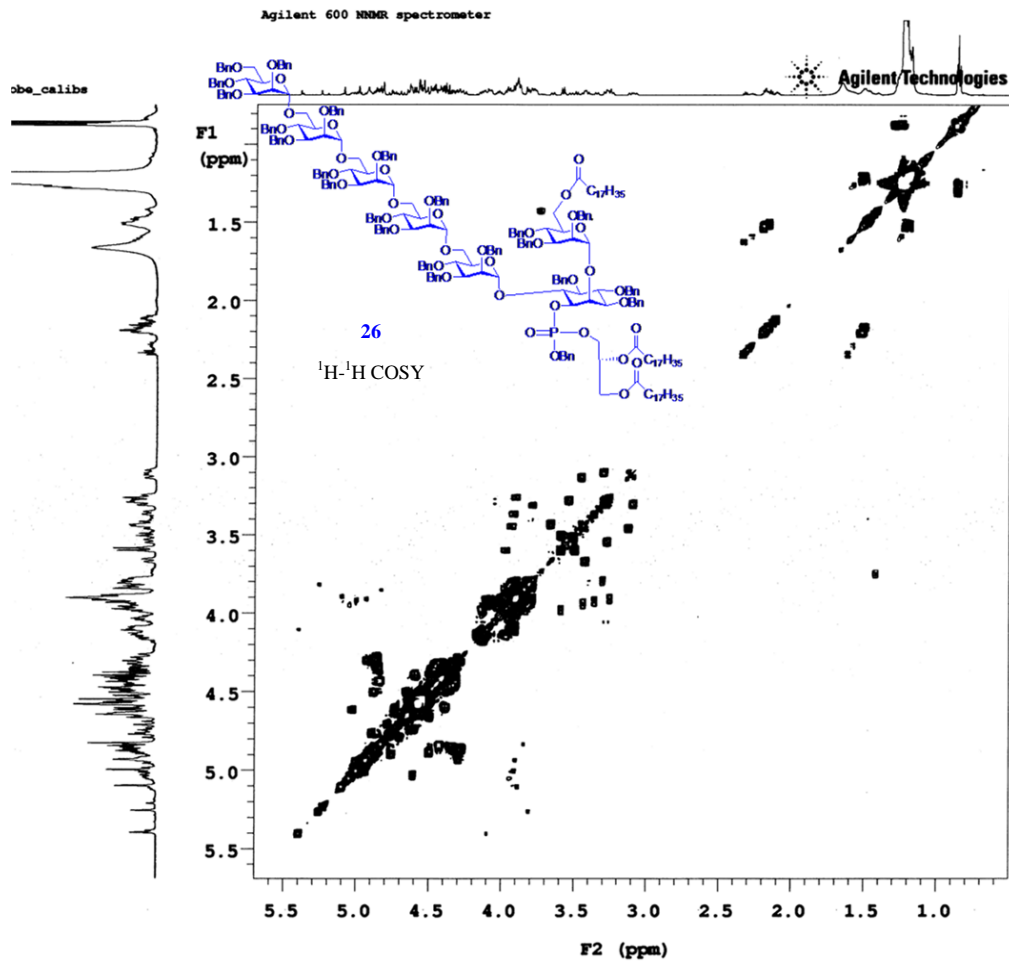

ame:  
 lected on:  
 nara600  
 directory:  
 vnmr1/vnmrays/probes/probe\_calibe  
 irectory:

gCOSY  
 uance: gCOSY  
 cdcl3  
 cted on: Jun 10 2013

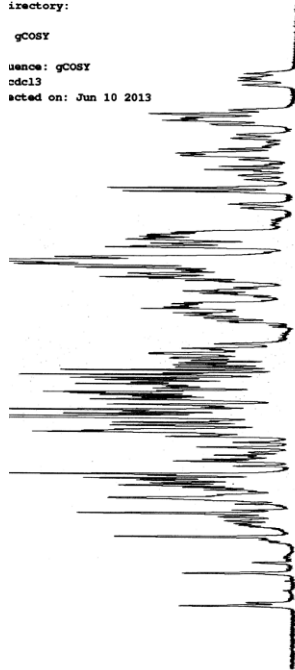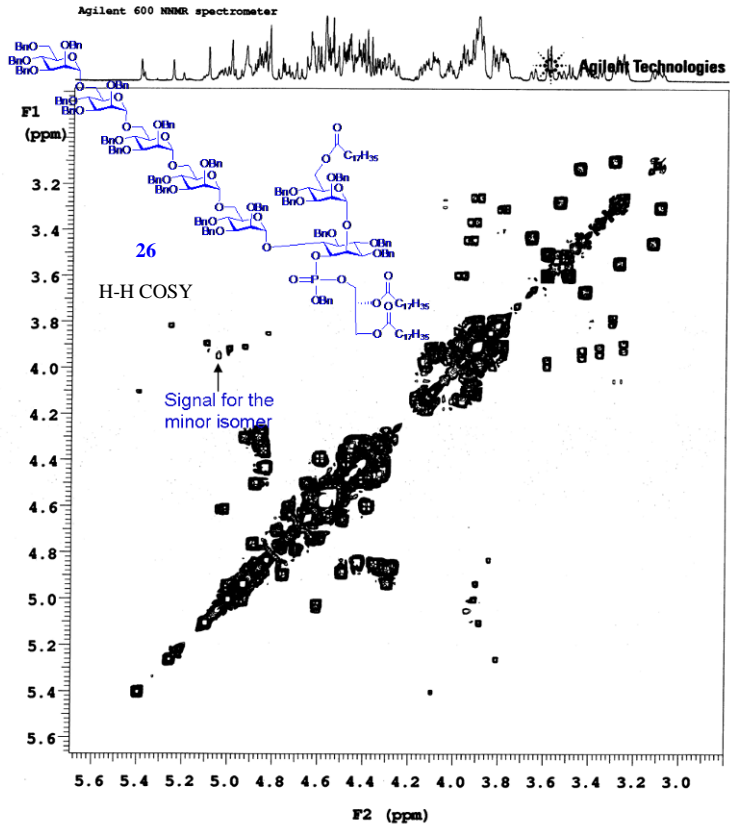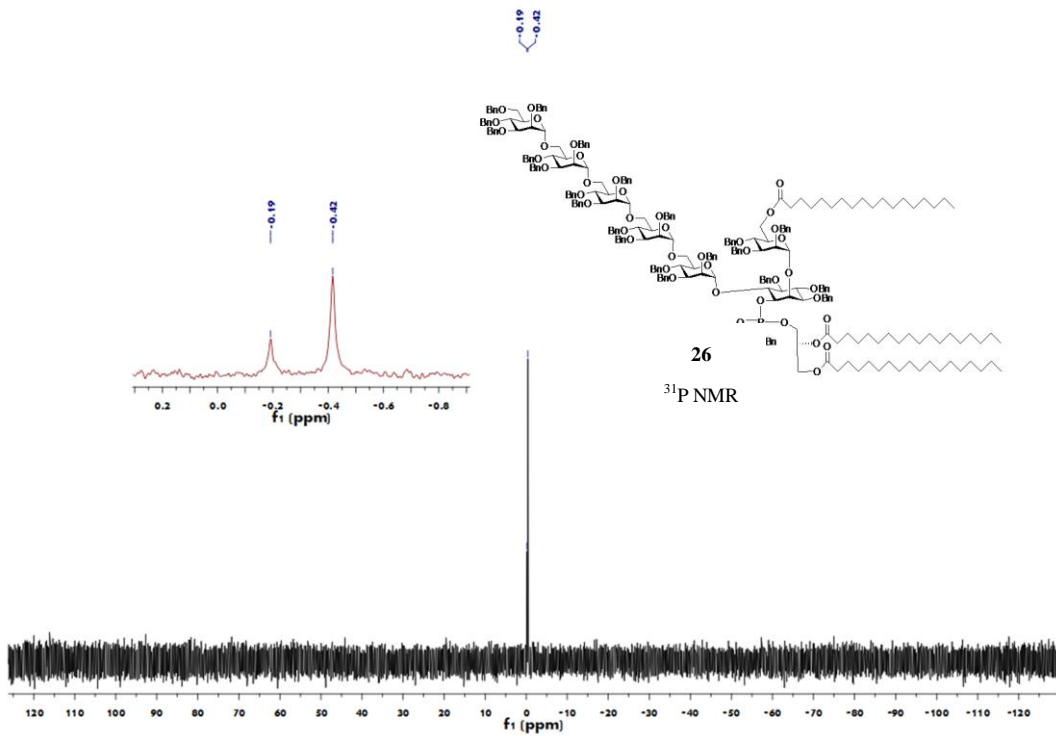



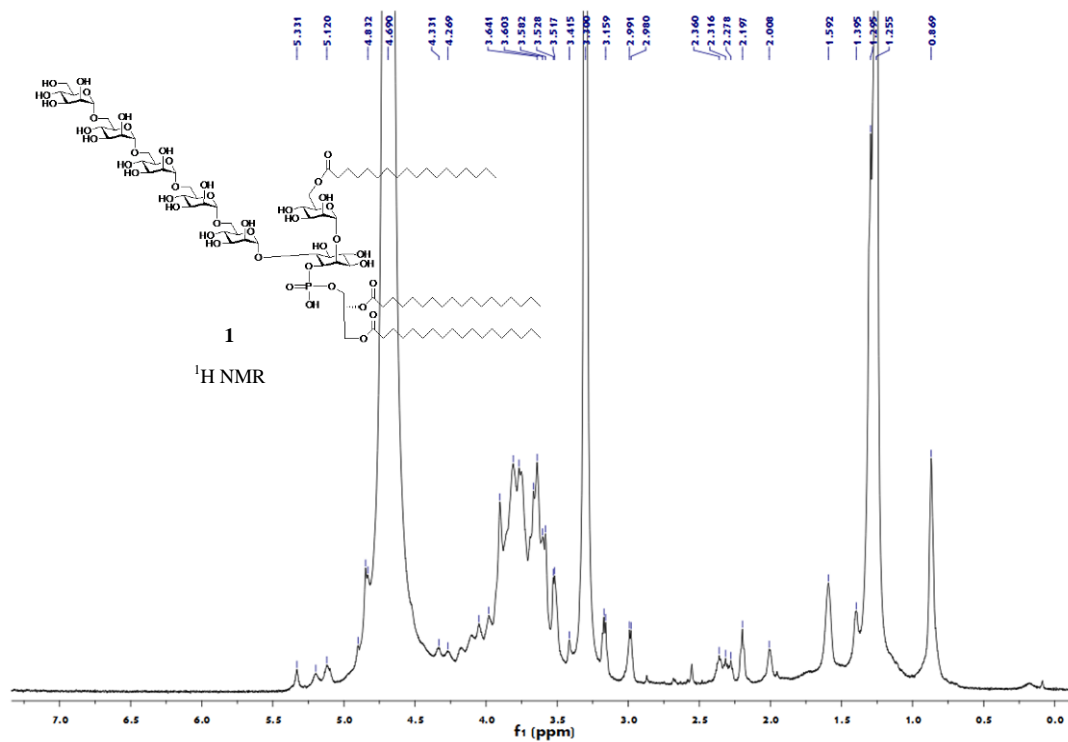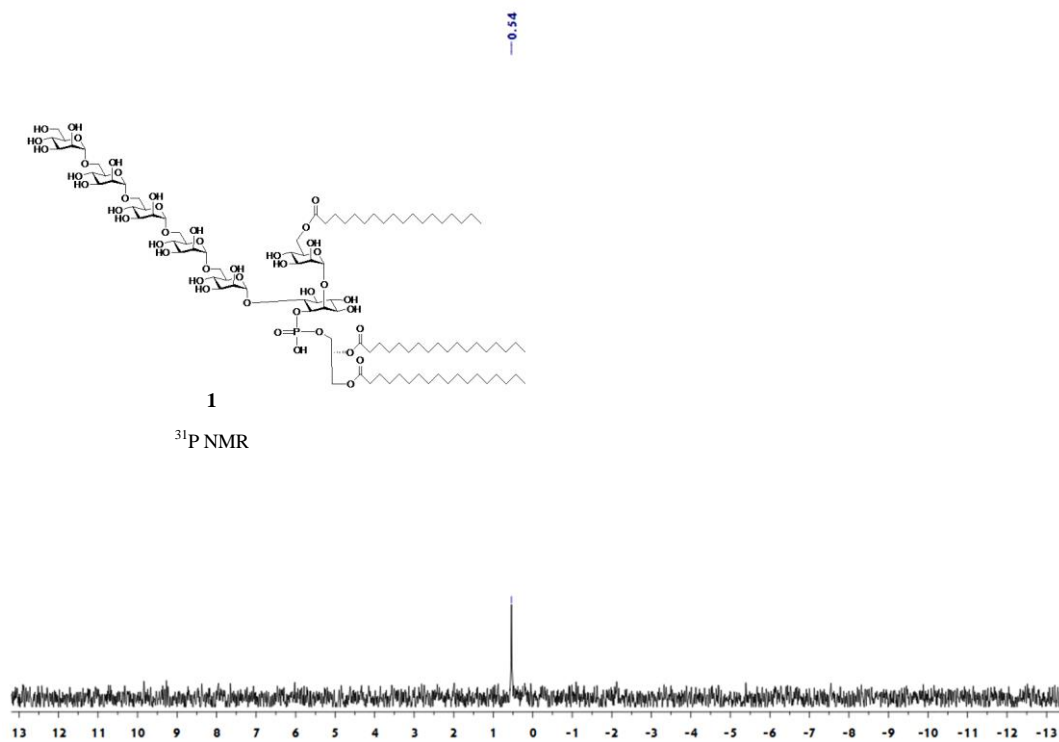

Supplement: NIHMS544457-supplement-1_si_001.pdf [file NIHMS544457-supplement-1_si_001.pdf]
